# Supplementary material for: Characteristics of knowledge translation platforms and methods for evaluating them: a scoping review protocol
Source: PubMed Central journal article supplement — BMJ Open. 2022 Jun 15;12(6):e061185. doi: 10.1136/bmjopen-2022-061185 (PMC9204454; doi:10.1136/bmjopen-2022-061185), 2022-06-15
Supplement: bmjopen-2022-061185.draft_revisions.pdf [file bmjopen-2022-061185.draft_revisions.pdf]

# BMJ Open

BMJ Open is committed to open peer review. As part of this commitment we make the peer review history of every article we publish publicly available.

When an article is published we post the peer reviewers' comments and the authors' responses online. We also post the versions of the paper that were used during peer review. These are the versions that the peer review comments apply to.

The versions of the paper that follow are the versions that were submitted during the peer review process. They are not the versions of record or the final published versions. They should not be cited or distributed as the published version of this manuscript.

BMJ Open is an open access journal and the full, final, typeset and author-corrected version of record of the manuscript is available on our site with no access controls, subscription charges or pay-per-view fees (<http://bmjopen.bmj.com>).

If you have any questions on BMJ Open's open peer review process please email [info.bmjopen@bmj.com](mailto:info.bmjopen@bmj.com)

# BMJ Open

## Characteristics and methods for mapping and evaluating knowledge translation platforms: a scoping review protocol

|                               |                                                                                                                                                                                                                                                                                                                                                                                                                                                                                                   |
|-------------------------------|---------------------------------------------------------------------------------------------------------------------------------------------------------------------------------------------------------------------------------------------------------------------------------------------------------------------------------------------------------------------------------------------------------------------------------------------------------------------------------------------------|
| Journal:                      | <i>BMJ Open</i>                                                                                                                                                                                                                                                                                                                                                                                                                                                                                   |
| Manuscript ID                 | bmjopen-2022-061185                                                                                                                                                                                                                                                                                                                                                                                                                                                                               |
| Article Type:                 | Protocol                                                                                                                                                                                                                                                                                                                                                                                                                                                                                          |
| Date Submitted by the Author: | 18-Jan-2022                                                                                                                                                                                                                                                                                                                                                                                                                                                                                       |
| Complete List of Authors:     | Schmidt, B; University of the Western Cape Faculty of Community and Health Sciences, School of Public Health<br>Cooper, Sara ; South African Medical Research Council, Cochrane South Africa<br>Young, Taryn; Stellenbosch University, Centre for Evidence-based Health Care, Faculty of Medicine and Health Sciences<br>Jessani, Nasreen S.; Stellenbosch University, Centre for Evidence-based Health Care; Johns Hopkins Bloomberg School of Public Health, Department of International Health |
| Keywords:                     | Health policy < HEALTH SERVICES ADMINISTRATION & MANAGEMENT, Public health < INFECTIOUS DISEASES, Organisational development < HEALTH SERVICES ADMINISTRATION & MANAGEMENT                                                                                                                                                                                                                                                                                                                        |
|                               |                                                                                                                                                                                                                                                                                                                                                                                                                                                                                                   |

SCHOLARONE™  
Manuscripts

# Characteristics and methods for mapping and evaluating knowledge translation platforms: a scoping review protocol

Bey-Marrié Schmidt<sup>1\*</sup> (PhD), Sara Cooper<sup>2</sup> (PhD), Taryn Young<sup>3</sup> (PhD), Nasreen S. Jessani<sup>3,4</sup> (Dr PH)

<sup>1</sup>School of Public Health, Faculty of Community and Health Sciences, University of the Western Cape, South Africa

<sup>2</sup>Cochrane South Africa, South African Medical Research Council, South Africa

<sup>3</sup>Centre for Evidence-based Health Care, Division of Epidemiology and Biostatistics, Faculty of Medicine and Health Sciences, Stellenbosch University, South Africa

<sup>4</sup>Department of International Health, Johns Hopkins Bloomberg School of Public Health, Baltimore, USA

## \*Corresponding Author:

Bey-Marrié Schmidt, [bschmidt@uwc.ac.za](mailto:bschmidt@uwc.ac.za), School of Public Health, Faculty of Community Health Sciences, University of the Western Cape, Robert Sobukwe Road, Bellville 7535, South Africa

Abstract word count: 328

Text word count: 1958

## Abstract

### Background

Knowledge translation platforms (KTPs) are intermediary organisations, initiatives or networks whose intent is to bridge the evidence into action divide. Strategies and tools include collaborative knowledge production, capacity building, information exchange and dialogue to facilitate relevant and timely engagement between researchers and decision-makers and other relevant stakeholders. With the wide range of definitions and descriptions of KTPs, there is a need to (a) provide a nuanced understanding of characteristics of KTPs and (b) assess and consolidate research methods used in mapping and evaluating KTPs to inform standardised process and impact evaluation.

### Methods

This scoping review will follow the recommended and accepted methods for scoping reviews and reporting guidelines. Eligibility for inclusion is: any conceptual or empirical health-related qualitative, quantitative and/or mixed method studies including (a) definitions, descriptions and models or frameworks of KTPs (including those that do not self-identify as KTPs, e.g. university research centres) and (b) research methods for mapping and/or evaluating KTPs. Searches will be carried out in PubMed, Scopus, CINAHL, EMBASE, Global Health and Web of Science using a pre-determined search strategy, without any date, language or geographic restrictions. Two reviewers will independently screen titles and abstracts. One reviewer will complete data extraction for all included studies, and another will check a sample of 50% of the included studies. The analysis and synthesis will provide: (a) an understanding of the various characteristics of KTPs; b) insight into characteristics or factors that make them resilient and/or adaptive to facilitate

1  
2  
3 impact (i.e. influence policy and practice); and (c) an overview of the different methods for  
4 mapping and evaluating KTPs.  
5  
6  
7  
8  
9

## 10 **Discussion**

11  
12 We will explore enhancing an existing framework for classifying KTPs, or perhaps even  
13 developing a new framework for identifying and monitoring KTPs if necessary and relevant. This  
14 would be a helpful first step in evaluating KTPs.  
15  
16  
17  
18  
19  
20  
21

## 22 **Keywords**

23  
24 Knowledge translation platform, knowledge broker, intermediary, evidence-informed decision-  
25 making.  
26  
27  
28  
29  
30  
31  
32  
33  
34  
35  
36  
37  
38  
39  
40  
41  
42  
43  
44  
45  
46  
47  
48  
49  
50  
51  
52  
53  
54  
55  
56  
57  
58  
59  
60

## Strengths and limitations of this study

- This scoping review will synthesise different definitions and descriptions of KTPs in the literature, for a common and nuanced understanding of what KTPs are.
- It will provide a better understanding of the different characteristics and types of KTPs, to inform funders and governments about their implementation, sustainability and overall support for evidence-informed policy and practice.
- This scoping review will also identify different qualitative, quantitative and mixed methods that can be used or combined to develop robust evaluations of KTPs. At a practical level, mapping KTPs can help like-minded organisations to identify opportunities that avoid duplication and amplify collaboration, particularly in settings where there are limited resources and expertise.
- The synthesis will guide the review authors in enhancing an existing framework for classifying KTPs, or developing a new framework for identifying and monitoring KTPs if necessary and relevant.
- Given the different terms used to describe KTPs, we may miss relevant publications. However, we will contact authors of included studies and/or experts in the field for additional references.

## Background

The global focus on achieving the Sustainable Development Goals (SDGs) and implementing Universal Health Coverage (UHC) has resulted in an increased demand for research evidence to inform policy and practice (1, 2). SDG 3 is about ensuring healthy lives and promoting wellbeing at all ages, which is closely linked with the aims of UHC (3). Universal health coverage aims to ensure that all people have access to needed and effective health services (including prevention, promotion, treatment, rehabilitation and palliation) of sufficient quality, without exposing users to financial hardship (4). However, despite the widely agreed SDGs and the UHC model, there is limited use of high-quality research on the effectiveness, acceptability and cost implications of health system, healthcare or public health interventions to inform policy, practice and implementation (5). Although research evidence on health-related interventions and systems are increasingly available, there are challenges around translating research evidence into policy and practice (5, 6, 7, 8).

Translating research evidence into policy and practice, or knowledge translation (KT), entails a “dynamic and iterative process that includes synthesis, dissemination, exchange and ethically sound application of knowledge to improve health, provide more effective health services and products and strengthen the healthcare system” (9). Limited institutional support and/or buy-in from leadership and relevant stakeholders for KT has been linked to several challenges (10, 11, 12, 13, 14), for example: poor infrastructure and inadequate financial and technical resources specifically for KT, inadequate soft skills, relationships and networks amongst evidence producers and evidence users negative attitudes and poor knowledge about what KT is and how to do it, and

1  
2  
3 scarce local research evidence relevant to micro-level policy and practice, amongst others (10, 11,  
4  
5 12, 13, 14).  
6  
7  
8  
9

10 KT platforms (KTPs) are intermediary organisations, initiatives or networks whose intent is to  
11  
12 overcome a range of inter-relationship and contextual challenges (see examples above) using a  
13  
14 multitude of strategies and tools. These include collaborative knowledge production, capacity  
15  
16 building, information exchange and dialogue to facilitate relevant and timely engagement between  
17  
18 researchers and different health decision-makers (e.g. patients, health practitioners, health care  
19  
20 managers, policy-makers and funders). There are currently a wide range of definitions and  
21  
22 descriptions (15-25) as well as models and frameworks (26, 27) of KTPs in the literature. But there  
23  
24 is only one published systematic review on KTPs by Partridge et al., which primarily synthesised  
25  
26 the lessons learned about activities, outputs, outcomes and impacts from KTPs specifically in  
27  
28 LMICs (28).  
29  
30  
31  
32  
33  
34

35 Firstly, there is a need to synthesise the different definitions and descriptions of KTPs in the  
36  
37 literature so as to provide a common and nuanced understanding of what KTPs are. This is  
38  
39 necessary for planning and carrying out comparisons and evaluations of KTPs, as one mechanism  
40  
41 for strengthening their overall usefulness. Secondly, there is a need to synthesise a wider range of  
42  
43 characteristics of KTPs beyond those characteristics explored in the Partridge review; for example:  
44  
45 strengths and limitations of different KTP models, funding and sustainability of KTPs, current  
46  
47 operational status (determined using evidence from the scoping review and institutional websites),  
48  
49 and the relationship between design and implementation factors or characteristics and successful  
50  
51 functioning of KTPs and their influence to policy and practice. Having a better understanding of  
52  
53  
54  
55  
56  
57  
58  
59  
60



1  
2  
3 the different characteristics and types of KTPs can inform funders and governments about their  
4 implementation, sustainability and overall support for evidence-informed policy and practice.  
5  
6 Additionally, identifying the different types of KTPs that can support evidence-informed policy  
7 and practice in local settings is critical, especially in the context of many public health and health  
8 system interventions for achieving UHC and the SDGs. For example, in the case that a KTP exists  
9 at the local level, decision-makers need to understand what KTPs are (including what KT is in  
10 general) and their role in supporting UHC decision-making processes. And thirdly, there is a need  
11 to synthesise the research methods used in the literature for mapping and evaluating KTPs.  
12 Identifying the different qualitative, quantitative and mixed methods used for mapping and  
13 evaluating KTPs is an important step in exploring how different methods can be used or combined  
14 to address the gap for more robust evaluations of KTPs. At a practical level, mapping KTPs can  
15 help like-minded organisations to identify opportunities that avoid duplication and amplify  
16 collaboration, particularly in settings where there are limited resources and expertise.  
17  
18  
19  
20  
21  
22  
23  
24  
25  
26  
27  
28  
29  
30  
31  
32  
33  
34

35 This scoping review therefore aims (a) provide a more nuanced understanding of the characteristics  
36 of KTPs and (b) assess and consolidate research methods used in mapping and evaluating KTPs  
37 to inform standardised process and impact evaluation. The review authors intend to use the review  
38 findings to inform a future research study on mapping, evaluating and strengthening KTPs that  
39 can support UHC policy, practice and implementation in South Africa.  
40  
41  
42  
43  
44  
45  
46  
47  
48  
49  
50  
51  
52  
53  
54  
55  
56  
57  
58  
59  
60

## Identifying the research questions

This scoping review is on the characteristics and methods for mapping and evaluating KTPs. The specific objectives of the scoping review are:

- To identify and synthesise definitions as well as characteristics of KTPs (for example: activities, processes, outputs, purpose, functions, models, stakeholders, positioning, funding, strengths, limitations, monitoring, impact and status);
- To identify and synthesise the design and implementation factors or characteristics that facilitate and/or hinder the successful functioning of KTPs and their influence to policy and practice;
- To identify and summarise the various research methods for mapping and evaluating KTPs (that is: qualitative, quantitative and mixed), and where evaluations were conducted, to synthesise their outcomes (e.g. impact, success or failure); and
- To explore the potential for developing a new or enhancing an existing framework for classifying KTPs.

## Identifying relevant studies

We will use the scoping review methods outlined by Arksey and O'Malley (29). The proposed steps are: identifying the research question; identifying relevant studies; study selection; charting the data; collating, summarising and reporting the results; and consultation (i.e. seeking insights beyond those in the literature from content experts). To report our review findings, we will follow

1  
2  
3 the PRISMA Extension for Scoping Reviews (PRISMA-ScR): Checklist and Explanation  
4  
5 **(Additional file 1)** (30).  
6  
7  
8  
9

10 Any published, empirical and conceptual, health research studies from anywhere on KTPs will be  
11 eligible. Qualitative, quantitative and/or mixed method studies are eligible for inclusion as long as  
12 they include a definition or description of what a KTP is and/or include one or more methods for  
13 mapping and/or evaluating KTPs. Eligible participants are KTP staff and users, e.g. researchers,  
14 knowledge brokers, policy-makers, health practitioners and managers, patients and community  
15 representatives, and journalists. KTPs can exist within and between different settings, e.g.  
16 universities, research councils, professional bodies, civil society organisations, community  
17 organisations and government.  
18  
19  
20  
21  
22  
23  
24  
25  
26  
27

28 The search will identify all relevant studies without data, language or geographic restrictions. We  
29 will search the following electronic databases: PubMed, Scopus, CINAHL, EMBASE, Global  
30 Health and Web of Science. Search strings will include keywords and Medical Subject Headings  
31 (MeSH) terms related to knowledge translation platform (concept A) (e.g. policy brief, deliberate  
32 dialogue, knowledge exchange) and evidence-informed decision-making (concept B) (e.g. health  
33 policy, policymaking). We have developed a preliminary search strategy in the PubMed database  
34 (see **Additional file 2**). To finalise our search strategy, we will apply an iterative approach to check  
35 whether known articles that meet our eligibility criteria were found by the search. We will also  
36 identify missing keywords and MeSH terms to add to our search strategy from the iterative process.  
37  
38  
39  
40  
41  
42  
43  
44  
45  
46  
47  
48  
49  
50  
51  
52  
53  
54  
55  
56  
57  
58  
59  
60

In addition to the electronic searches, review authors will search the reference lists of all included studies and key references (for example, relevant systematic reviews) and (b) contact authors of included studies and/or experts in the field for additional references.

## Study selection

The search across databases will identify titles and abstracts of relevant studies. The search results will be merged in the Endnote reference management programme where duplicates will be removed. The titles and abstracts will then be uploaded to an electronic programme, such as Covidence or Rayyan, for screening and data extraction. Two review authors will independently screen the titles and abstracts to determine their eligibility for full-text screening. We will retrieve full-texts for titles and abstracts deemed relevant. One review author (BMS) will screen all full-texts and make a final decision about inclusion. Another review author will check the eligibility of a random sample of 50% of the full-texts. Conflicts will be resolved with a third reviewer. The study selection process will be summarised using a Preferred Reporting Items for Systematic Reviews and Meta-Analyses (PRISMA) flow diagram.

## Charting the data

Data extraction or ‘charting of data’ will be carried out once we have a final list of all the studies to be included in the review. Data extraction will be conducted by one review author (BMS) who will collect, sift and sort data according to the objectives. The review author will extract information on the study and author details; research type and study design; research setting and participants; definitions, descriptions and characteristics of KTPs; and methods used for mapping and/or evaluating KTPs. A second review author will check data extraction of all included studies. Data extraction will be done in Excel to allow for comparison of key items across studies and to allow for synthesis within and across data items. Once all the data has been extracted and checked,

1  
2  
3 studies will be categorised or ‘charted’ according to the following criteria: (a) what is a KTP?  
4  
5 And/or (b) what methods are used to map and/or evaluate a KTP? Additional categories may be  
6  
7 identified during the data extraction process, in consultation with the review team. We will not  
8  
9 assess the methodological quality of the included studies, as that is the convention for such scoping  
10  
11 reviews (29, 30).  
12  
13  
14  
15  
16

## 17 **Collating, summarising, and reporting the results**

18  
19  
20  
21

22 One review author (BMS) will conduct data analysis using manual coding and data synthesis  
23  
24 methods on the extracted and charted data. A second review author will check the data analysis  
25  
26 work on an ongoing basis to ensure quality of the process. We will synthesise the data according  
27  
28 to variation (breadth) and key components (depth) across definitions, characteristics and methods  
29  
30 of KTPs. The analysis will combine quantitative and qualitative syntheses to provide an overview  
31  
32 of our findings. First, we will conduct a numerical analysis of all the included studies according to  
33  
34 different categories, e.g. study design (qualitative, quantitative, mixed), participants (KTP staff  
35  
36 versus users), KTP characteristics (model, function, institution), income level of country (low,  
37  
38 middle and high). Second, we will conduct a qualitative narrative synthesis of the definitions,  
39  
40 characteristics and methods of KTPs by looking for the key components across the data. The  
41  
42 numerical and narrative syntheses will provide (a) an overview of the key aspects of KTP studies,  
43  
44 (b) definitions and conceptualisations of KTPs, and (c) research methods for mapping and/or  
45  
46 evaluating KTPs.  
47  
48  
49  
50  
51  
52  
53  
54  
55  
56  
57  
58  
59  
60

## Consultations

As mentioned earlier, to identify additional relevant studies, we will contact authors of included studies and/or experts in the field. We will engage with other KT researchers (i.e. those undertaking scientific research in the KT field) and KT practitioners (i.e. those designing, implementing, monitoring and evaluating KT interventions) as we carry out different stages of this scoping review to ensure its relevance and applicability. It is an advantage that our review team is made up of both KT researchers and practitioners who have the appropriate content and methods expertise to ensure scientific rigour of the review. We will shape the review process and findings according what we know is most useful from experience, and also draw on colleagues working in the field to validate the findings and extract key messages or implications for research and practice.

## Patient and Public Involvement

There was no patient or public involvement in the design of this protocol.

## Discussion

To our knowledge, this is the first scoping review of the evidence on KTPs globally. Our synthesis will be on the wide range of definitions, descriptions and characteristics of KTPs and aims to provide a better understanding of the relationship between some of the characteristics of KTPs (for example, we will explore the relationship between KTP design, success factors and effectiveness

1  
2  
3 or impact). A key methodological strength of the scoping review is that we will scope for both  
4  
5 conceptual and empirical studies, using any study design, and without applying any date, language  
6  
7 or geographic restrictions.  
8  
9

10  
11  
12 Mapping KTPs in this scoping review can help researchers and other stakeholders leading KTPs  
13  
14 identify opportunities for collaborating with other KTPs in their local setting or globally.  
15  
16 Collaborations amongst KTPs can potentially reduce duplication of efforts and optimise the use of  
17  
18 already-limited resources and expertise to effectively engage decision-makers. Additionally, a  
19  
20 synthesis of the characteristics of KTPs can help researchers and other stakeholders leading KTPs  
21  
22 compare and evaluate the usefulness and effectiveness of different KTPs in relation to theirs.  
23  
24 Evidence on the usefulness and effectiveness of KTPs, areas of improvement and the gaps in  
25  
26 research can guide government and funding agencies' agendas. The review findings can also help  
27  
28 decision-makers identify KTPs to collaborate with and provide them with an understanding of how  
29  
30 KTPs can support their decision-making processes. And lastly, the synthesis will guide review  
31  
32 authors in developing a matrix or framework for classifying KTPs and inform the design of a future  
33  
34 study to map and evaluate KTPs that can support UHC policy, practice and implementation in  
35  
36 South Africa.  
37  
38  
39  
40  
41  
42  
43  
44

## 45 **Ethics and dissemination**

46  
47  
48  
49

50 This is a scoping review of completed studies. As such, our research does not require ethics  
51  
52 approval, as we do not involve human participants. The results will be submitted to a peer-  
53  
54 reviewed scientific journal for publication and as conference presentations.  
55  
56  
57

## Contributions

BMS conceptualised the protocol together with TY and NJ. BMS drafted the protocol with the help of all authors. All authors reviewed and approved the final manuscript before final submission for peer review.

## Funding

Research reported in this publication was supported by the South African Medical Research Council (SAMRC) through its Division of Research Capacity Development under the Research Capacity Development Initiative from funding received from the South African National Treasury. The content and findings reported or illustrated are the sole deduction, view and responsibility of the researcher and do not reflect the official position and sentiments of the SAMRC.

## Competing interests

The authors declare that they have no competing interests.

## Data sharing statement

Unpublished study data, such as the final search strategies, will be made available in the review publication and/or upon request from the corresponding author.

## Acknowledgements

We would like to thank Mrs. Joy Oliver, Cochrane South Africa, South African Medical Research Council, who assisted with developing the search strategy.



## References

1. Special Programme for Research and Training in Tropical Diseases (TDR). 2019. Promoting implementation research for accelerating universal health coverage. <https://www.who.int/tdr/news/2019/promoting-ir-for-accelerating-uhc/en/>
2. Eichler R, Gigli S, LeRoy L. 2018. Implementation Research to Strengthen Health Care Financing Reforms Toward Universal Health Coverage in Indonesia: A Mixed-Methods Approach to Real-World Monitoring. *Global Health: Science and Practice*, 6(4): 747-753; <https://doi.org/10.9745/GHSP-D-18-00328>
3. United Nations (UN). 2019. Take action for the Sustainable Development Goals. <https://www.un.org/sustainabledevelopment/sustainable-development-goals/>
4. World Health Organisation. 2020. What is health financing for universal coverage? [https://www.who.int/health\\_financing/universal\\_coverage\\_definition/en/](https://www.who.int/health_financing/universal_coverage_definition/en/)
5. Uneke C, Ndukwe C, Ezeoha A, Uro-Chukwu H, Ezeonu C. 2015. Implementation of a Health Policy Advisory Committee as a Knowledge Translation Platform: The Nigeria Experience. *International Journal of Health Policy and Management*, 4(3): 161-168; <https://dx.doi.org/10.15171/ijhpm.2015.21>
6. Langlois EV, Becerril Montekio V, Young T, Song K, Alcalde-Rabanal J, Tran N. 2016. Enhancing evidence informed policymaking in complex health systems: lessons from multi-site collaborative approaches. *Health Research Policy Systems*, 14(20); <https://dx.doi.org/10.1186/s12961-016-0089-0>
7. Mathews C, Goga A, Loveday M, Zembe W, Daviaud E, Siegfried N, Lewin S. 2018. Moving towards universal health coverage: Strengthening the evidence ecosystem for the

- 1  
2  
3 South African health system. *South African Medical Journal (Research)*, 109(1);  
4  
5 <https://dx.doi.org/10.7196/SAMJ.2019.v109i11b.14245>  
6  
7
- 8 8. Young T, Garner P, Clarke M, Volmink J. 2017. Series: Clinical Epidemiology in South  
9 Africa. Paper 1: Evidence-based health care and policy in Africa: past, present, and future.  
10 *Journal of Clinical Epidemiology*, 8(2017); <https://doi.org/10.1016/j.jclinepi.2016.06.006>  
11  
12  
13
- 14 9. Straus SE, Tetroe J, Graham I. 2009. Defining knowledge translation. *Canadian Medical*  
15 *Association Journal*, 181(3-4): 165-168; <https://doi.org/10.1503/cmaj.081229>  
16  
17  
18
- 19 10. Kalbarczyk A, Rodriguez DC, Mahendradhata Y, Sarker M, Seme A, Majumdar P,  
20 Akinyemi OO, Kayembe P, Alonge OO. 2021. Barriers and facilitators to knowledge  
21 translation activities within academic institutions in low- and middle-income countries.  
22 *Health Policy and Planning*, 00; <https://doi.org/10.1093/heapol/czaa188>  
23  
24  
25  
26  
27
- 28 11. Jessani NS, Siddiqi SM, Babcock C, Davey-Rothwell M, Ho S, Holtgrave DR. 2018.  
29 Factors affecting engagement between academic faculty and decision-makers: learnings  
30 and priorities for a school of public health. *Health Research Policy and Systems*, 16(65);  
31 <https://doi.org/10.1186/s12961-018-0342-9>  
32  
33  
34  
35  
36  
37
- 38 12. Jessani NS, Babcock C, Siddiqi S, Davey-Rothwell M, Ho S, Holtgrave DR. 2018.  
39 Relationships between public health faculty and decision makers at four governmental  
40 levels: a social network analysis. *Evidence & Policy: A Journal of Research, Debate and*  
41 *Practice*, 14(3); <https://doi.org/10.1332/174426418X15230282334424>  
42  
43  
44  
45  
46
- 47 13. Malla C, Aylward P, Ward P. Knowledge translation for public health in low- and  
48 middle- income countries: a critical interpretive synthesis. 2018. *Global Health Research*  
49 *Policy*, 3 (1); <https://doi.org/10.1186/s41256-018-0084-9>  
50  
51  
52  
53  
54  
55  
56  
57

- 1  
2  
3 14. Mahendradhata Y, Kalbarczyk A. 2021. Prioritizing knowledge translation in low- and  
4 middle-income countries to support pandemic response and preparedness. Health  
5 Research Policy Systems, 19 (1); <https://doi.org/10.1186/s12961-020-00670-1>  
6  
7  
8  
9  
10 15. Orton L, Lloyd-Williams F, Taylor-Robinson D, O'Flaherty M, Capewell S. 2011. The  
11 use of research evidence in public health decision making processes: systematic review.  
12 PLoS One, 6(7); <https://doi.org/10.1371/journal.pone.0021704>  
13  
14  
15  
16  
17 16. Young T, Shearer JC, Naude C, Kredo T, Wiysonge CS, Garner P. Researcher and  
18 policymaker dialogue: the Policy BUDDIES Project in Western Cape Province, South  
19 Africa. 2018. BMJ Global Health, 3(6); <http://dx.doi.org/10.1136/bmjgh-2018-001130>  
20  
21  
22  
23  
24 17. Kothari A, MacLean L, Edwards N. 2009. Increasing capacity for knowledge translation:  
25 understanding how some researchers engage policy makers. Evidence & Policy: A  
26 Journal of Research, Debate and Practice, 8(1):1-21;  
27  
28  
29  
30  
31 <https://doi.org/10.1332/174426409X395402>  
32  
33 18. Berman J, Mitambo C, Matanje-Mwagomba B, Khan S, Kachimanga C, Wroe E, et al.  
34 2015. Building a knowledge translation platform in Malawi to support evidence-informed  
35 health policy. Health Research Policy and Systems, 13(73);  
36  
37  
38  
39  
40 <https://doi.org/10.1186/s12961-015-0061-4>  
41  
42  
43 19. Cheung A, Lavis JN, Hamandi A, El-Jardali F, Sachs J, Sewankambo N, Knowledge-  
44 Translation Platform Evaluation Team. 2011. Climate for evidence-informed health  
45 systems: A print media analysis in 44 low- and middle-income countries that host  
46 knowledge-translation platforms. Health Research Policy Systems, 9 (1);  
47  
48  
49  
50  
51 <https://doi.org/10.1186/1478-4505-9-7>  
52  
53  
54  
55  
56  
57  
58  
59  
60

- 1  
2  
3 20. El-Jardali F, Ataya N, Jamal D, et al. 2012. A multi-faceted approach to promote  
4 knowledge translation platforms in eastern Mediterranean countries: climate for  
5 evidence-informed policy. *Health Research Policy Systems*, 10 (1);  
6  
7  
8  
9  
10 <https://doi.org/10.1186/1478-4505-10-15>  
11  
12 21. Kasonde JM, Campbell S. 2012. Creating a Knowledge Translation Platform: nine  
13 lessons from the Zambia Forum for Health Research. *Health Research Policy and*  
14  
15  
16  
17  
18 Systems, 10 (1); <https://doi.org/10.1186/1478-4505-10-31>  
19  
20 22. Ongolo-Zogo P, Lavis JN, Tomson G, Sewankambo NK. 2018. Assessing the influence  
21 of knowledge translation platforms on health system policy processes to achieve the  
22 health millennium development goals in Cameroon and Uganda: a comparative case  
23 study. *Health Policy Plan*, 33(4): 539-554; <https://doi.org/10.1093/heapol/czx194>  
24  
25  
26  
27  
28 23. Poldrugovac M, Kuchenmüller T, Dobrin PT, Ivanuša M. 2016. The evidence-informed  
29 policy-making context in Slovenia: groundwork for a knowledge translation platform.  
30  
31  
32  
33  
34 Public Health Panorama, 2(3): 313-318; <https://apps.who.int/iris/handle/10665/325376>  
35  
36 24. Scarlett J, Köhler K, Reinap M. Evidence-informed Policy Network (EVIPNet) Europe:  
37 success stories in knowledge translation. *Public Health Panorama*, 4(02): 161-169;  
38  
39  
40  
41  
42  
43  
44  
45  
46  
47  
48 Policy, 12(1): 109-126; <http://dx.doi.org/10.1332/204674315X14297901956276>  
49  
50 26. Bennett G, Jessani N (Editors). *The Knowledge Translation Toolkit: Bridging the Know-*  
51  
52  
53  
54  
55  
56  
57  
58  
59  
60 Do Gap: A Resource for Researchers. Sage Publications, International Development

1  
2  
3 Research Centre; [https://www.idrc.ca/en/book/knowledge-translation-toolkit-bridging-](https://www.idrc.ca/en/book/knowledge-translation-toolkit-bridging-know-do-gap-resource-researchers)  
4  
5 [know-do-gap-resource-researchers](https://www.idrc.ca/en/book/knowledge-translation-toolkit-bridging-know-do-gap-resource-researchers)  
6

- 7  
8 27. Pettman TL, Armstrong R, Johnson S, Love P, Gill T, Coveney J, Swinburn B, Allender  
9  
10 S. 2020. Evaluation outcomes of a knowledge translation platform: a structure for support  
11  
12 and exchange in prevention. *Evidence & Policy: A Journal of Research, Debate and*  
13  
14 *Practice*, 16(1): 99-12; <https://doi.org/10.1332/174426418X15260526569269>  
15  
16  
17 28. Partridge ACR, Mansilla C, Randhawa H, et al. 2020. Lessons learned from descriptions  
18  
19 and evaluations of knowledge translation platforms supporting evidence-informed policy-  
20  
21 making in low- and middle-income countries: a systematic review. *Health Research*  
22  
23 *Policy Systems*, 18 (1); <https://doi.org/10.1186/s12961-020-00626-5>  
24  
25  
26 29. Arksey H, O'Malley L. 2005. Scoping studies: towards a methodological framework.  
27  
28 *International Journal of Social Research Methodology*, 8(1): 19–32;  
29  
30 <https://doi.org/10.1080/1364557032000119616>  
31  
32  
33 30. Tricco AC, Lillie E, Zarin W, et al. 2018. PRISMA Extension for Scoping Reviews  
34  
35 (PRISMA-ScR): Checklist and Explanation. *Annals of Internal Medicine*, 169(7): 467-  
36  
37 473; <https://doi.org/10.7326/M18-0850>  
38  
39  
40  
41  
42  
43  
44  
45  
46  
47  
48  
49  
50  
51  
52  
53  
54  
55  
56  
57  
58  
59  
60

## Preferred Reporting Items for Systematic reviews and Meta-Analyses extension for Scoping Reviews (PRISMA-ScR) Checklist

| SECTION                                               | ITEM | PRISMA-ScR CHECKLIST ITEM                                                                                                                                                                                                                                                                                  | REPORTED ON PAGE #    |
|-------------------------------------------------------|------|------------------------------------------------------------------------------------------------------------------------------------------------------------------------------------------------------------------------------------------------------------------------------------------------------------|-----------------------|
| <b>TITLE</b>                                          |      |                                                                                                                                                                                                                                                                                                            |                       |
| Title                                                 | 1    | Identify the report as a scoping review.                                                                                                                                                                                                                                                                   | 1                     |
| <b>ABSTRACT</b>                                       |      |                                                                                                                                                                                                                                                                                                            |                       |
| Structured summary                                    | 2    | Provide a structured summary that includes (as applicable): background, objectives, eligibility criteria, sources of evidence, charting methods, results, and conclusions that relate to the review questions and objectives.                                                                              | 2-3                   |
| <b>INTRODUCTION</b>                                   |      |                                                                                                                                                                                                                                                                                                            |                       |
| Rationale                                             | 3    | Describe the rationale for the review in the context of what is already known. Explain why the review questions/objectives lend themselves to a scoping review approach.                                                                                                                                   | 5-6                   |
| Objectives                                            | 4    | Provide an explicit statement of the questions and objectives being addressed with reference to their key elements (e.g., population or participants, concepts, and context) or other relevant key elements used to conceptualize the review questions and/or objectives.                                  | 7                     |
| <b>METHODS</b>                                        |      |                                                                                                                                                                                                                                                                                                            |                       |
| Protocol and registration                             | 5    | Indicate whether a review protocol exists; state if and where it can be accessed (e.g., a Web address); and if available, provide registration information, including the registration number.                                                                                                             | n/a                   |
| Eligibility criteria                                  | 6    | Specify characteristics of the sources of evidence used as eligibility criteria (e.g., years considered, language, and publication status), and provide a rationale.                                                                                                                                       | 8                     |
| Information sources*                                  | 7    | Describe all information sources in the search (e.g., databases with dates of coverage and contact with authors to identify additional sources), as well as the date the most recent search was executed.                                                                                                  | 8                     |
| Search                                                | 8    | Present the full electronic search strategy for at least 1 database, including any limits used, such that it could be repeated.                                                                                                                                                                            | 8 & Additional file 2 |
| Selection of sources of evidence†                     | 9    | State the process for selecting sources of evidence (i.e., screening and eligibility) included in the scoping review.                                                                                                                                                                                      | 9                     |
| Data charting process‡                                | 10   | Describe the methods of charting data from the included sources of evidence (e.g., calibrated forms or forms that have been tested by the team before their use, and whether data charting was done independently or in duplicate) and any processes for obtaining and confirming data from investigators. | 9                     |
| Data items                                            | 11   | List and define all variables for which data were sought and any assumptions and simplifications made.                                                                                                                                                                                                     | 9                     |
| Critical appraisal of individual sources of evidence§ | 12   | If done, provide a rationale for conducting a critical appraisal of included sources of evidence; describe the methods used and how this information was used in any data synthesis (if appropriate).                                                                                                      | n/a                   |

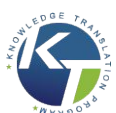

| SECTION                                       | ITEM | PRISMA-ScR CHECKLIST ITEM                                                                                                                                                                       | REPORTED ON PAGE # |
|-----------------------------------------------|------|-------------------------------------------------------------------------------------------------------------------------------------------------------------------------------------------------|--------------------|
| Synthesis of results                          | 13   | Describe the methods of handling and summarizing the data that were charted.                                                                                                                    | 10                 |
| <b>RESULTS</b>                                |      |                                                                                                                                                                                                 |                    |
| Selection of sources of evidence              | 14   | Give numbers of sources of evidence screened, assessed for eligibility, and included in the review, with reasons for exclusions at each stage, ideally using a flow diagram.                    | n/a                |
| Characteristics of sources of evidence        | 15   | For each source of evidence, present characteristics for which data were charted and provide the citations.                                                                                     | n/a                |
| Critical appraisal within sources of evidence | 16   | If done, present data on critical appraisal of included sources of evidence (see item 12).                                                                                                      | n/a                |
| Results of individual sources of evidence     | 17   | For each included source of evidence, present the relevant data that were charted that relate to the review questions and objectives.                                                           | n/a                |
| Synthesis of results                          | 18   | Summarize and/or present the charting results as they relate to the review questions and objectives.                                                                                            | n/a                |
| <b>DISCUSSION</b>                             |      |                                                                                                                                                                                                 |                    |
| Summary of evidence                           | 19   | Summarize the main results (including an overview of concepts, themes, and types of evidence available), link to the review questions and objectives, and consider the relevance to key groups. | n/a                |
| Limitations                                   | 20   | Discuss the limitations of the scoping review process.                                                                                                                                          | n/a                |
| Conclusions                                   | 21   | Provide a general interpretation of the results with respect to the review questions and objectives, as well as potential implications and/or next steps.                                       | 11                 |
| <b>FUNDING</b>                                |      |                                                                                                                                                                                                 |                    |
| Funding                                       | 22   | Describe sources of funding for the included sources of evidence, as well as sources of funding for the scoping review. Describe the role of the funders of the scoping review.                 | 18                 |

JBI = Joanna Briggs Institute; PRISMA-ScR = Preferred Reporting Items for Systematic reviews and Meta-Analyses extension for Scoping Reviews.

\* Where *sources of evidence* (see second footnote) are compiled from, such as bibliographic databases, social media platforms, and Web sites.

† A more inclusive/heterogeneous term used to account for the different types of evidence or data sources (e.g., quantitative and/or qualitative research, expert opinion, and policy documents) that may be eligible in a scoping review as opposed to only studies. This is not to be confused with *information sources* (see first footnote).

‡ The frameworks by Arksey and O'Malley (6) and Levac and colleagues (7) and the JBI guidance (4, 5) refer to the process of data extraction in a scoping review as data charting.

§ The process of systematically examining research evidence to assess its validity, results, and relevance before using it to inform a decision. This term is used for items 12 and 19 instead of "risk of bias" (which is more applicable to systematic reviews of interventions) to include and acknowledge the various sources of evidence that may be used in a scoping review (e.g., quantitative and/or qualitative research, expert opinion, and policy document).

From: Tricco AC, Lillie E, Zarin W, O'Brien KK, Colquhoun H, Levac D, et al. PRISMA Extension for Scoping Reviews (PRISMA-ScR): Checklist and Explanation. *Ann Intern Med.* 2018;169:467–473. doi: 10.7326/M18-0850.

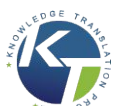

**Database: PubMed**

| Search | Query                                                                                                                                                                                                                                                                                                                                                                                                                                                                                                                                                                                                                                                                                                                                        |
|--------|----------------------------------------------------------------------------------------------------------------------------------------------------------------------------------------------------------------------------------------------------------------------------------------------------------------------------------------------------------------------------------------------------------------------------------------------------------------------------------------------------------------------------------------------------------------------------------------------------------------------------------------------------------------------------------------------------------------------------------------------|
| #3     | Search: #1 AND #2                                                                                                                                                                                                                                                                                                                                                                                                                                                                                                                                                                                                                                                                                                                            |
| #2     | Search: health policy[mh] OR policy maker[tiab] OR policy makers[tiab] OR policymaker[tiab] OR policymakers[tiab] OR policy making[tiab] OR policymaking[tiab] OR decision making[mh] OR decision making[tiab] OR decisionmaking[tiab] OR decision maker[tiab] OR decision makers[tiab] OR stakeholder[tiab] OR stakeholders[tiab]                                                                                                                                                                                                                                                                                                                                                                                                           |
| #1     | Search: translational medical research[mh] OR translational medical research[tiab] OR translational medical science[tiab] OR medical translational research[tiab] OR translational medicine[tiab] OR knowledge translation[tiab] OR translational research[tiab] OR evidence-informed[tiab] OR evidence brief[tiab] OR evidence briefs[tiab] OR policy brief[tiab] OR policy briefs[tiab] OR deliberative dialogue[tiab] OR deliberative dialogues[tiab] OR knowledge synthesis[tiab] OR knowledge syntheses[tiab] OR knowledge transfer[tiab] OR research uptake[tiab] OR evidence summary[tiab] OR evidence summaries[tiab] OR knowledge uptake[tiab] OR knowledge exchange[tiab] OR research to action[tiab] OR knowledge to action[tiab] |



# BMJ Open

## Characteristics of knowledge translation platforms and methods for evaluating them: a scoping review protocol

|                                 |                                                                                                                                                                                                                                                                                                                                                                                                                                                                                                   |
|---------------------------------|---------------------------------------------------------------------------------------------------------------------------------------------------------------------------------------------------------------------------------------------------------------------------------------------------------------------------------------------------------------------------------------------------------------------------------------------------------------------------------------------------|
| Journal:                        | <i>BMJ Open</i>                                                                                                                                                                                                                                                                                                                                                                                                                                                                                   |
| Manuscript ID                   | bmjopen-2022-061185.R1                                                                                                                                                                                                                                                                                                                                                                                                                                                                            |
| Article Type:                   | Protocol                                                                                                                                                                                                                                                                                                                                                                                                                                                                                          |
| Date Submitted by the Author:   | 06-May-2022                                                                                                                                                                                                                                                                                                                                                                                                                                                                                       |
| Complete List of Authors:       | Schmidt, B; University of the Western Cape Faculty of Community and Health Sciences, School of Public Health<br>Cooper, Sara ; South African Medical Research Council, Cochrane South Africa<br>Young, Taryn; Stellenbosch University, Centre for Evidence-based Health Care, Faculty of Medicine and Health Sciences<br>Jessani, Nasreen S.; Stellenbosch University, Centre for Evidence-based Health Care; Johns Hopkins Bloomberg School of Public Health, Department of International Health |
| <b>Primary Subject Heading</b>: | Health policy                                                                                                                                                                                                                                                                                                                                                                                                                                                                                     |
| Secondary Subject Heading:      | Public health                                                                                                                                                                                                                                                                                                                                                                                                                                                                                     |
| Keywords:                       | Health policy < HEALTH SERVICES ADMINISTRATION & MANAGEMENT, Public health < INFECTIOUS DISEASES, Organisational development < HEALTH SERVICES ADMINISTRATION & MANAGEMENT                                                                                                                                                                                                                                                                                                                        |
|                                 |                                                                                                                                                                                                                                                                                                                                                                                                                                                                                                   |

SCHOLARONE™  
Manuscripts

# Characteristics of knowledge translation platforms and methods for evaluating them: a scoping review protocol

Bey-Marrié Schmidt<sup>1\*</sup> (PhD), Sara Cooper<sup>2</sup> (PhD), Taryn Young<sup>3</sup> (PhD), Nasreen S. Jessani<sup>3,4</sup> (Dr PH)

<sup>1</sup>School of Public Health, Faculty of Community and Health Sciences, University of the Western Cape, South Africa

<sup>2</sup>Cochrane South Africa, South African Medical Research Council, South Africa

<sup>3</sup>Centre for Evidence-based Health Care, Division of Epidemiology and Biostatistics, Faculty of Medicine and Health Sciences, Stellenbosch University, South Africa

<sup>4</sup>Department of International Health, Johns Hopkins Bloomberg School of Public Health, Baltimore, USA

## \*Corresponding Author:

Bey-Marrié Schmidt, [bschmidt@uwc.ac.za](mailto:bschmidt@uwc.ac.za), School of Public Health, Faculty of Community Health Sciences, University of the Western Cape, Robert Sobukwe Road, Bellville 7535, South Africa

Abstract word count: 328

Text word count: 1958

## Abstract

### Background

Knowledge translation platforms (KTPs) are intermediary organisations, initiatives or networks whose intent is to bridge the evidence into action divide. Strategies and tools include collaborative knowledge production, capacity building, information exchange and dialogue to facilitate relevant and timely engagement between researchers and decision-makers and other relevant stakeholders. With the wide range of definitions and descriptions of KTPs, there is a need to (a) provide a nuanced understanding of characteristics of KTPs and (b) assess and consolidate research methods used in mapping and evaluating KTPs to inform standardised process and impact evaluation.

### Methods

This scoping review will follow the recommended and accepted methods for scoping reviews and reporting guidelines. Eligibility for inclusion is: any conceptual or empirical health-related qualitative, quantitative and/or mixed method studies including (a) definitions, descriptions and models or frameworks of KTPs (including those that do not self-identify as KTPs, e.g. university research centres) and (b) research methods for mapping and/or evaluating KTPs. Searches will be carried out in PubMed, Scopus, CINAHL, EMBASE, Global Health and Web of Science using a pre-determined search strategy, without any date, language or geographic restrictions. Two reviewers will independently screen titles and abstracts. One reviewer will complete data extraction for all included studies, and another will check a sample of 50% of the included studies. The analysis and synthesis will provide: (a) an understanding of the various characteristics of KTPs; b) insight into characteristics or factors that make them resilient and/or adaptive to facilitate

1  
2  
3 impact (i.e. influence policy and practice); and (c) an overview of the various methods for mapping  
4  
5 and evaluating KTPs.  
6  
7  
8  
9

## 10 **Discussion**

11  
12 We will explore enhancing an existing framework for classifying KTPs, or perhaps even  
13  
14 developing a new framework for identifying and monitoring KTPs if necessary and relevant. This  
15  
16 would be a helpful first step in evaluating KTPs.  
17  
18  
19  
20  
21

## 22 **Keywords**

23  
24 Knowledge translation platform, knowledge broker, intermediary, evidence-informed decision-  
25  
26 making.  
27  
28  
29  
30  
31  
32  
33  
34  
35  
36  
37  
38  
39  
40  
41  
42  
43  
44  
45  
46  
47  
48  
49  
50  
51  
52  
53  
54  
55  
56  
57  
58  
59  
60

## Strengths and limitations of this study

- This scoping review will synthesise definitions and descriptions of KTPs in the literature, for a common and nuanced understanding of what KTPs are.
- It will provide a better understanding of the characteristics and types of KTPs, to inform funders and governments about their implementation, sustainability and overall support for evidence-informed policy and practice.
- This scoping review will also identify different qualitative, quantitative and mixed methods that can be used or combined to develop robust evaluations of KTPs. At a practical level, mapping KTPs can help like-minded organisations to identify opportunities that avoid duplication and amplify collaboration, particularly in settings where there are limited resources and expertise.
- The synthesis will guide the review authors in enhancing an existing framework for classifying KTPs, or developing a new framework for identifying and monitoring KTPs if necessary and relevant.
- Given the different terms used to describe KTPs, we may miss relevant publications. However, we will contact authors of included studies and/or experts in the field for additional references.

## Background

The global focus on achieving the Sustainable Development Goals (SDGs) and implementing Universal Health Coverage (UHC) has resulted in an increased demand for research evidence to inform policy and practice (1, 2). SDG 3 is about ensuring healthy lives and promoting wellbeing at all ages, which is closely linked with the aims of UHC (3). Universal health coverage aims to ensure that all people have access to needed and effective health services (including prevention, promotion, treatment, rehabilitation and palliation) of sufficient quality, without exposing users to financial hardship (4). However, despite the widely agreed SDGs and the UHC model, there is limited use of high-quality research on the effectiveness, acceptability and cost implications of health system, healthcare or public health interventions to inform policy, practice and implementation (5). Although research evidence on health-related interventions and systems are increasingly available, there are challenges around translating research evidence into policy and practice (5, 6, 7, 8).

Translating research evidence into policy and practice, or knowledge translation (KT), entails a “dynamic and iterative process that includes synthesis, dissemination, exchange and ethically sound application of knowledge to improve health, provide more effective health services and products and strengthen the healthcare system” (9). Limited institutional support and/or buy-in from leadership and relevant stakeholders for KT has been linked to several challenges (10, 11, 12, 13, 14), for example: poor infrastructure and inadequate financial and technical resources specifically for KT, inadequate soft skills, relationships and networks amongst evidence producers and evidence users negative attitudes and poor knowledge about what KT is and how to do it, and

1  
2  
3 scarce local research evidence relevant to micro-level policy and practice, amongst others (10, 11,  
4  
5 12, 13, 14).  
6  
7  
8  
9

10 KT platforms (KTPs) are intermediary organisations, initiatives or networks whose intent is to  
11  
12 overcome a range of inter-relationship and contextual challenges (see examples above) using a  
13  
14 multitude of strategies and tools (15, 16). These include collaborative knowledge production,  
15  
16 capacity building, information exchange and dialogue to facilitate relevant and timely engagement  
17  
18 between researchers and different health decision-makers (e.g. patients, health practitioners, health  
19  
20 care managers, policy-makers and funders). There are currently a wide range of definitions and  
21  
22 descriptions (17-27) as well as models and frameworks (28, 29) of KTPs in the literature. But there  
23  
24 is only one published systematic review on KTPs by Partridge et al., which primarily synthesised  
25  
26 the lessons learned about activities, outputs, outcomes and impacts from KTPs specifically in  
27  
28 LMICs (30).  
29  
30  
31  
32  
33  
34

35 Firstly, there is a need to synthesise the different definitions and descriptions of KTPs in the  
36  
37 literature so as to provide a common and nuanced understanding of what KTPs are. This is  
38  
39 necessary for planning and carrying out comparisons and evaluations of KTPs, as one mechanism  
40  
41 for strengthening their overall usefulness. Secondly, there is a need to synthesise a wider range of  
42  
43 characteristics of KTPs beyond those characteristics explored in the Partridge review; for example:  
44  
45 strengths and limitations of different KTP models, funding and sustainability of KTPs, current  
46  
47 operational status (determined using evidence from the scoping review and institutional websites),  
48  
49 and the relationship between design and implementation factors or characteristics and successful  
50  
51 functioning of KTPs and their influence to policy and practice. Having a better understanding of  
52  
53  
54  
55  
56  
57  
58  
59  
60

1  
2  
3 the different characteristics and types of KTPs can inform funders and governments about their  
4 implementation, sustainability and overall support for evidence-informed policy and practice.  
5  
6 Additionally, identifying the different types of KTPs that can support evidence-informed policy  
7 and practice in local settings is critical, especially in the context of many public health and health  
8 system interventions for achieving UHC and the SDGs. For example, in the case that a KTP exists  
9 at the local level, decision-makers need to understand what KTPs are (including what KT is in  
10 general) and their role in supporting UHC decision-making processes. And thirdly, there is a need  
11 to synthesise the research methods used in the literature for mapping and evaluating KTPs.  
12 Identifying the different qualitative, quantitative and mixed methods used for mapping and  
13 evaluating KTPs is an important step in exploring how different methods can be used or combined  
14 to address the gap for more robust evaluations of KTPs. At a practical level, mapping KTPs can  
15 help like-minded organisations to identify opportunities that avoid duplication and amplify  
16 collaboration, particularly in settings where there are limited resources and expertise.  
17  
18  
19  
20  
21  
22  
23  
24  
25  
26  
27  
28  
29  
30  
31  
32  
33  
34

35 This scoping review therefore aims (a) provide a more nuanced understanding of the characteristics  
36 of KTPs and (b) assess and consolidate research methods used in mapping and evaluating KTPs  
37 to inform standardised process and impact evaluation. The review authors intend to use the review  
38 findings to inform a future research study on mapping, evaluating and strengthening KTPs that  
39 can support UHC policy, practice and implementation in South Africa.  
40  
41  
42  
43  
44  
45  
46  
47  
48  
49  
50  
51  
52  
53  
54  
55  
56  
57  
58  
59  
60



## Identifying the research questions

This scoping review is on the characteristics and methods for mapping and evaluating KTPs. The specific objectives of the scoping review are:

- To identify and synthesise definitions as well as characteristics of KTPs (for example: activities, processes, outputs, purpose, functions, models, stakeholders, positioning, funding, strengths, limitations, monitoring, impact and status);
- To identify and synthesise the design and implementation factors or characteristics that facilitate and/or hinder the successful functioning of KTPs and their influence to policy and practice;
- To identify and summarise the various research methods for mapping and evaluating KTPs (that is: qualitative, quantitative and mixed), and where evaluations were conducted, to synthesise their outcomes (e.g. impact, success or failure); and
- To explore the potential for developing a new or enhancing an existing framework for classifying KTPs.

## Identifying relevant studies

We will use the scoping review methods outlined by Arksey and O'Malley (31). The proposed steps are: identifying the research question; identifying relevant studies; study selection; charting the data; collating, summarising and reporting the results; and consultation (i.e. seeking insights beyond those in the literature from content experts). To report our review findings, we will follow

1  
2  
3 the PRISMA Extension for Scoping Reviews (PRISMA-ScR): Checklist and Explanation (see  
4  
5 **Supplementary File 1**) (30). We aim to conduct the proposed steps by February 2023.  
6  
7  
8  
9

10 Any published, empirical and conceptual, health research studies from anywhere on KTPs will be  
11 eligible. Qualitative, quantitative and/or mixed method studies are eligible for inclusion as long as  
12 they include a definition or description of what a KTP is and/or include one or more methods for  
13 mapping and/or evaluating KTPs. Eligible participants are KTP staff and users, e.g. researchers,  
14 knowledge brokers, policy-makers, health practitioners and managers, patients and community  
15 representatives, and journalists. KTPs can exist within and between different settings, e.g.  
16 universities, research councils, professional bodies, civil society organisations, community  
17 organisations and government (15, 16).  
18  
19  
20  
21  
22  
23  
24  
25  
26  
27  
28  
29  
30

31 The search will identify all relevant studies without data, language or geographic restrictions. We  
32 will search the following electronic databases: PubMed, Scopus, CINAHL, EMBASE, Global  
33 Health and Web of Science. Search strings will include keywords and Medical Subject Headings  
34 (MeSH) terms related to knowledge translation platform (concept A) (e.g. policy brief, deliberate  
35 dialogue, knowledge exchange) and evidence-informed decision-making (concept B) (e.g. health  
36 policy, policymaking). We have developed a preliminary search strategy in the PubMed database  
37 (see **Supplementary File 2**). To finalise our search strategy, we will apply an iterative approach  
38 to check whether known articles that meet our eligibility criteria were found by the search. We  
39 will also identify missing keywords and MeSH terms to add to our search strategy from the  
40 iterative process. In addition to the electronic searches, review authors will search the reference  
41  
42  
43  
44  
45  
46  
47  
48  
49  
50  
51  
52  
53  
54  
55  
56  
57  
58  
59  
60

1  
2  
3 lists of all included studies and key references (for example, relevant systematic reviews) and (b)  
4  
5 contact authors of included studies and/or experts in the field for additional references.  
6  
7  
8  
9

## 10 **Study selection**

11  
12  
13  
14

15 The search across databases will identify titles and abstracts of relevant studies. The search results  
16 will be merged in the Endnote reference management programme where duplicates will be  
17 removed. The titles and abstracts will then be uploaded to an electronic programme, such as  
18 Covidence or Rayyan, for screening and data extraction. An eligibility form will be developed  
19 before screening starts. The following inclusion criteria will be used:  
20  
21  
22  
23  
24  
25  
26  
27  
28

### 29 Focus of studies:

30

- 31 • definitions and characteristics of KTPs (e.g. activities, processes, outputs, purpose,  
32 functions, models, stakeholders, positioning, funding, strengths, limitations, monitoring,  
33 impact and status)  
34  
35
- 36 • factors or characteristics that facilitate and/or hinder the successful functioning of KTPs  
37 and their influence to policy and practice  
38  
39
- 40 • research methods for mapping and evaluating KTPs (that is: qualitative, quantitative and  
41 mixed)  
42  
43
- 44 • evaluation outcomes of KTPs (e.g. impact, success or failure); and  
45  
46
- 47 • existing framework for classifying KTPs  
48  
49  
50  
51  
52  
53  
54  
55  
56  
57  
58  
59  
60

1  
2  
3 The outcomes of KTPs (success or failure) will be based on what the KTPs themselves aim to  
4 achieve through their activities and processes. Where a KTP has been evaluated, the review team  
5 will use the evaluation results to determine which factors or characteristics contributed to its  
6 success or challenges. Where a KTP has not been evaluated, the review team will explore what the  
7 primary authors deem as important factors or characteristics that facilitate and/or hinder its  
8 successful functioning and influence on policy and practice  
9  
10  
11  
12  
13  
14  
15  
16  
17  
18

19 Participants:

- 20 • KTP staff and users (e.g. researchers, knowledge brokers, policy-makers, health  
21 practitioners and managers, patients and community representatives, and journalists).

22  
23  
24  
25  
26  
27  
28 Setting:

- 29 • KTPs can exist within and between different settings (e.g. research centres or departments,  
30 universities, research councils, professional bodies, civil society organisations, community  
31 organisations and government).

32  
33  
34  
35  
36  
37  
38  
39  
40 Two review authors will independently screen the titles and abstracts to determine their eligibility  
41 for full-text screening. We will retrieve full-texts for titles and abstracts deemed relevant. One  
42 review author (BMS) will screen all full-texts and make a final decision about inclusion. Another  
43 review author will check the eligibility of a random sample of 50% of the full-texts. Conflicts will  
44 be resolved with a third reviewer. The study selection process will be summarised using a Preferred  
45 Reporting Items for Systematic Reviews and Meta-Analyses (PRISMA) flow diagram.  
46  
47  
48  
49  
50  
51  
52  
53  
54  
55  
56  
57

## Charting the data

Data extraction or ‘charting of data’ will be carried out once we have a final list of all the studies to be included in the review. Data extraction will be conducted by one review author (BMS) who will collect, sift and sort data according to the objectives. The review author will extract information on the study and author details; research type and study design; research setting and participants; definitions, descriptions and characteristics of KTPs; and methods used for mapping and/or evaluating KTPs. A second review author will check data extraction of all included studies. Data extraction will be done in Excel to allow for comparison of key items across studies and to allow for synthesis within and across data items. Once all the data has been extracted and checked, studies will be categorised or ‘charted’ according to the following criteria: (a) what is a KTP? And/or (b) what methods are used to map and/or evaluate a KTP? Additional categories may be identified during the data extraction process, in consultation with the review team. We will not assess the methodological quality of the included studies, as that is the convention for such scoping reviews (29, 30).

## Collating, summarising, and reporting the results

One review author (BMS) will conduct data analysis using manual coding and data synthesis methods on the extracted and charted data. A second review author will check the data analysis work on an ongoing basis to ensure quality of the process. We will synthesise the data according to variation (breadth) and key components (depth) across definitions, characteristics and methods of KTPs. The analysis will combine quantitative and qualitative syntheses to provide an overview

1  
2  
3 of our findings. First, we will conduct a numerical analysis of all the included studies according to  
4 different categories, e.g. study design (qualitative, quantitative, mixed), participants (KTP staff  
5 versus users), KTP characteristics (model, function, institution), income level of country (low,  
6 middle and high). Second, we will conduct a qualitative narrative synthesis of the definitions,  
7 characteristics and methods of KTPs by looking for the key components across the data. The  
8 numerical and narrative syntheses will provide (a) an overview of the key aspects of KTP studies,  
9 (b) definitions and conceptualisations of KTPs, and (c) research methods for mapping and/or  
10 evaluating KTPs.  
11  
12  
13  
14  
15  
16  
17  
18  
19  
20  
21  
22  
23

## 24 **Consultations**

25  
26  
27  
28  
29 As mentioned earlier, to identify additional relevant studies, we will contact authors of included  
30 studies and/or experts in the field. We will engage with other KT researchers (i.e. those undertaking  
31 scientific research in the KT field) and KT practitioners (i.e. those designing, implementing,  
32 monitoring and evaluating KT interventions) as we carry out different stages of this scoping review  
33 to ensure its relevance and applicability. It is an advantage that our review team is made up of both  
34 KT researchers and practitioners who have the appropriate content and methods expertise to ensure  
35 scientific rigour of the review. We will shape the review process and findings according what we  
36 know is most useful from experience, and also draw on colleagues working in the field to validate  
37 the findings and extract key messages or implications for research and practice.  
38  
39  
40  
41  
42  
43  
44  
45  
46  
47  
48  
49  
50  
51  
52  
53  
54  
55  
56  
57  
58  
59  
60

## Patient and Public Involvement

There was no patient or public involvement in the design of this protocol.

## Discussion

To our knowledge, this is the first scoping review of the evidence on KTPs globally. Our synthesis will be on the wide range of definitions, descriptions and characteristics of KTPs and aims to provide a better understanding of the relationship between some of the characteristics of KTPs (for example, we will explore the relationship between KTP design, success factors and effectiveness or impact). A key methodological strength of the scoping review is that we will scope for both conceptual and empirical studies, using any study design, and without applying any date, language or geographic restrictions.

Mapping KTPs in this scoping review can help researchers and other stakeholders leading KTPs identify opportunities for collaborating with other KTPs in their local setting or globally. Collaborations amongst KTPs can potentially reduce duplication of efforts and optimise the use of already-limited resources and expertise to effectively engage decision-makers. Additionally, a synthesis of the characteristics of KTPs can help researchers and other stakeholders leading KTPs compare and evaluate the usefulness and effectiveness of different KTPs in relation to theirs. Evidence on the usefulness and effectiveness of KTPs, areas of improvement and the gaps in research can guide government and funding agencies' agendas. Further, the review findings can help decision-makers identify KTPs to collaborate with and provide them with an understanding

1  
2  
3 of how KTPs can support their decision-making processes. And lastly, the synthesis will guide  
4 review authors in developing a matrix or framework for classifying KTPs and inform the design  
5  
6 of a future study to map and evaluate KTPs that can support UHC policy, practice and  
7  
8 implementation in South Africa.  
9  
10  
11  
12  
13  
14

## 15 **Ethics and dissemination**

16  
17  
18  
19  
20 This is a scoping review of completed studies. As such, our research does not require ethics  
21 approval, as we do not involve human participants. The results will be submitted to a peer-  
22 reviewed scientific journal for publication and as conference presentations.  
23  
24  
25  
26  
27  
28  
29

## 30 **Contributions**

31  
32 BMS conceptualised the protocol together with TY and NJ. BMS drafted the protocol with SC and  
33 TY providing methodological expertise and NJ content expertise. All authors reviewed and  
34 approved the final manuscript before final submission for peer review.  
35  
36  
37  
38  
39  
40  
41

## 42 **Funding**

43  
44 Research reported in this publication was supported by the South African Medical Research  
45 Council (SAMRC) through its Division of Research Capacity Development under the Research  
46 Capacity Development Initiative from funding received from the South African National Treasury.  
47  
48 The content and findings reported or illustrated are the sole deduction, view and responsibility of  
49  
50  
51  
52  
53  
54  
55  
56  
57  
58  
59  
60



## Competing interests

The authors declare that they have no competing interests.

## Data sharing statement

Unpublished study data, such as the final search strategies, will be made available in the review publication and/or upon request from the corresponding author.

## Acknowledgements

We would like to thank Mrs. Joy Oliver, Cochrane South Africa, South African Medical Research Council, who assisted with developing the search strategy.

## References

1. Special Programme for Research and Training in Tropical Diseases (TDR). 2019. Promoting implementation research for accelerating universal health coverage. <https://www.who.int/tdr/news/2019/promoting-ir-for-accelerating-uhc/en/>
2. Eichler R, Gigli S, LeRoy L. 2018. Implementation Research to Strengthen Health Care Financing Reforms Toward Universal Health Coverage in Indonesia: A Mixed-Methods Approach to Real-World Monitoring. *Global Health: Science and Practice*, 6(4): 747-753; <https://doi.org/10.9745/GHSP-D-18-00328>
3. United Nations (UN). 2019. Take action for the Sustainable Development Goals. <https://www.un.org/sustainabledevelopment/sustainable-development-goals/>

- 1  
2  
3 4. World Health Organisation. 2020. What is health financing for universal coverage?  
4  
5 [https://www.who.int/health\\_financing/universal\\_coverage\\_definition/en/](https://www.who.int/health_financing/universal_coverage_definition/en/)  
6
- 7  
8 5. Uneke C, Ndukwe C, Ezeoha A, Uro-Chukwu H, Ezeonu C. 2015. Implementation of a  
9  
10 Health Policy Advisory Committee as a Knowledge Translation Platform: The Nigeria  
11  
12 Experience. *International Journal of Health Policy and Management*, 4(3): 161-168;  
13  
14 <https://dx.doi.org/10.15171/ijhpm.2015.21>  
15
- 16  
17 6. Langlois EV, Becerril Montekio V, Young T, Song K, Alcalde-Rabanal J, Tran N. 2016.  
18  
19 Enhancing evidence informed policymaking in complex health systems: lessons from  
20  
21 multi-site collaborative approaches. *Health Research Policy Systems*, 14(20);  
22  
23 <https://dx.doi.org/10.1186/s12961-016-0089-0>  
24
- 25  
26 7. Mathews C, Goga A, Loveday M, Zembe W, Daviaud E, Siegfried N, Lewin S. 2018.  
27  
28 Moving towards universal health coverage: Strengthening the evidence ecosystem for the  
29  
30 South African health system. *South African Medical Journal (Research)*, 109(1);  
31  
32 <https://dx.doi.org/10.7196/SAMJ.2019.v109i11b.14245>  
33
- 34  
35 8. Young T, Garner P, Clarke M, Volmink J. 2017. Series: Clinical Epidemiology in South  
36  
37 Africa. Paper 1: Evidence-based health care and policy in Africa: past, present, and future.  
38  
39 *Journal of Clinical Epidemiology*, 8(2017); <https://doi.org/10.1016/j.jclinepi.2016.06.006>  
40
- 41  
42 9. Straus SE, Tetroe J, Graham I. 2009. Defining knowledge translation. *Canadian Medical*  
43  
44 *Association Journal*, 181(3-4): 165-168; <https://doi.org/10.1503/cmaj.081229>  
45
- 46  
47 10. Kalbarczyk A, Rodriguez DC, Mahendradhata Y, Sarker M, Seme A, Majumdar P,  
48  
49 Akinyemi OO, Kayembe P, Alonge OO. 2021. Barriers and facilitators to knowledge  
50  
51 translation activities within academic institutions in low- and middle-income countries.  
52  
53 *Health Policy and Planning*, 00; <https://doi.org/10.1093/heapol/czaa188>  
54  
55

- 1  
2  
3 11. Jessani NS, Siddiqi SM, Babcock C, Davey-Rothwell M, Ho S, Holtgrave DR. 2018.  
4  
5 Factors affecting engagement between academic faculty and decision-makers: learnings  
6  
7 and priorities for a school of public health. *Health Research Policy and Systems*, 16(65);  
8  
9 <https://doi.org/10.1186/s12961-018-0342-9>  
10  
11  
12 12. Jessani NS, Babcock C, Siddiqi S, Davey-Rothwell M, Ho S, Holtgrave DR. 2018.  
13  
14 Relationships between public health faculty and decision makers at four governmental  
15  
16 levels: a social network analysis. *Evidence & Policy: A Journal of Research, Debate and*  
17  
18 *Practice*, 14(3); <https://doi.org/10.1332/174426418X15230282334424>  
19  
20  
21 13. Malla C, Aylward P, Ward P. Knowledge translation for public health in low- and  
22  
23 middle- income countries: a critical interpretive synthesis. 2018. *Global Health Research*  
24  
25 *Policy*, 3 (1); <https://doi.org/10.1186/s41256-018-0084-9>  
26  
27  
28 14. Mahendradhata Y, Kalbarczyk A. 2021. Prioritizing knowledge translation in low- and  
29  
30 middle-income countries to support pandemic response and preparedness. *Health*  
31  
32 *Research Policy Systems*, 19 (1); <https://doi.org/10.1186/s12961-020-00670-1>  
33  
34  
35 15. Partridge ACR, Mansilla C, Randhawa H, et al. 2020. Lessons learned from descriptions  
36  
37 and evaluations of knowledge translation platforms supporting evidence-informed policy-  
38  
39 making in low- and middle-income countries: a systematic review. *Health Research*  
40  
41 *Policy Systems*, 18 (1); <https://doi.org/10.1186/s12961-020-00626-5>  
42  
43  
44 16. Johnson NA, Lavis JN. 2010. *Procedures Manual for Evaluating Knowledge Translation*  
45  
46 *Platforms in Low- and Middle Income Countries*. McMaster University Program in  
47  
48 *Policy Decision-Making*; <http://hdl.handle.net/10625/49084>  
49  
50  
51  
52  
53  
54  
55  
56  
57  
58  
59  
60

- 1  
2  
3 17. Orton L, Lloyd-Williams F, Taylor-Robinson D, O'Flaherty M, Capewell S. 2011. The  
4 use of research evidence in public health decision making processes: systematic review.  
5 PLoS One, 6(7); <https://doi.org/10.1371/journal.pone.0021704>  
6  
7  
8  
9  
10 18. Young T, Shearer JC, Naude C, Kredt T, Wiysonge CS, Garner P. Researcher and  
11 policymaker dialogue: the Policy BUDDIES Project in Western Cape Province, South  
12 Africa. 2018. BMJ Global Health, 3(6); <http://dx.doi.org/10.1136/bmjgh-2018-001130>  
13  
14  
15  
16  
17 19. Kothari A, MacLean L, Edwards N. 2009. Increasing capacity for knowledge translation:  
18 understanding how some researchers engage policy makers. Evidence & Policy: A  
19 Journal of Research, Debate and Practice, 8(1):1-21;  
20  
21  
22 <https://doi.org/10.1332/174426409X395402>  
23  
24  
25  
26 20. Berman J, Mitambo C, Matanje-Mwagomba B, Khan S, Kachimanga C, Wroe E, et al.  
27 2015. Building a knowledge translation platform in Malawi to support evidence-informed  
28 health policy. Health Research Policy and Systems, 13(73);  
29  
30  
31 <https://doi.org/10.1186/s12961-015-0061-4>  
32  
33  
34  
35 21. Cheung A, Lavis JN, Hamandi A, El-Jardali F, Sachs J, Sewankambo N, Knowledge-  
36 Translation Platform Evaluation Team. 2011. Climate for evidence-informed health  
37 systems: A print media analysis in 44 low- and middle-income countries that host  
38 knowledge-translation platforms. Health Research Policy Systems, 9 (1);  
39  
40  
41  
42 <https://doi.org/10.1186/1478-4505-9-7>  
43  
44  
45  
46  
47 22. El-Jardali F, Ataya N, Jamal D, et al. 2012. A multi-faceted approach to promote  
48 knowledge translation platforms in eastern Mediterranean countries: climate for  
49 evidence-informed policy. Health Research Policy Systems, 10 (1);  
50  
51  
52  
53 <https://doi.org/10.1186/1478-4505-10-15>  
54  
55  
56  
57

- 1  
2  
3 23. Kasonde JM, Campbell S. 2012. Creating a Knowledge Translation Platform: nine  
4 lessons from the Zambia Forum for Health Research. *Health Research Policy and*  
5 *Systems*, 10 (1); <https://doi.org/10.1186/1478-4505-10-31>  
6  
7  
8  
9  
10 24. Ongolo-Zogo P, Lavis JN, Tomson G, Sewankambo NK. 2018. Assessing the influence  
11 of knowledge translation platforms on health system policy processes to achieve the  
12 health millennium development goals in Cameroon and Uganda: a comparative case  
13 study. *Health Policy Plan*, 33(4): 539-554; <https://doi.org/10.1093/heapol/czx194>  
14  
15  
16  
17  
18 25. Poldrugovac M, Kuchenmüller T, Dobrin PT, Ivanuša M. 2016. The evidence-informed  
19 policy-making context in Slovenia: groundwork for a knowledge translation platform.  
20 *Public Health Panorama*, 2(3): 313-318; <https://apps.who.int/iris/handle/10665/325376>  
21  
22  
23  
24 26. Scarlett J, Köhler K, Reinap M. Evidence-informed Policy Network (EVIPNet) Europe:  
25 success stories in knowledge translation. *Public Health Panorama*, 4(02): 161-169;  
26  
27 <https://apps.who.int/iris/handle/10665/325029>  
28  
29  
30  
31  
32 27. Pettman TL, Armstrong R, Waters E, et al. 2016. Evaluation of a knowledge translation  
33 and exchange platform to advance non-communicable disease prevention. *Evidence and*  
34 *Policy*, 12(1): 109-126; <http://dx.doi.org/10.1332/204674315X14297901956276>  
35  
36  
37  
38  
39 28. Bennett G, Jessani N (Editors). 2011. *The Knowledge Translation Toolkit: Bridging the*  
40 *Know–Do Gap: A Resource for Researchers*. Sage Publications, International  
41 *Development Research Centre*; [https://www.idrc.ca/en/book/knowledge-translation-](https://www.idrc.ca/en/book/knowledge-translation-toolkit-bridging-know-do-gap-resource-researchers)  
42 [toolkit-bridging-know-do-gap-resource-researchers](https://www.idrc.ca/en/book/knowledge-translation-toolkit-bridging-know-do-gap-resource-researchers)  
43  
44  
45  
46  
47  
48 29. Pettman TL, Armstrong R, Johnson S, Love P, Gill T, Coveney J, Swinburn B, Allender  
49 S. 2020. Evaluation outcomes of a knowledge translation platform: a structure for support  
50  
51  
52  
53  
54  
55  
56  
57  
58  
59  
60

1  
2  
3 and exchange in prevention. Evidence & Policy: A Journal of Research, Debate and  
4  
5 Practice, 16(1): 99-12; <https://doi.org/10.1332/174426418X15260526569269>  
6  
7

8 30. Arksey H, O'Malley L. 2005. Scoping studies: towards a methodological framework.  
9  
10 International Journal of Social Research Methodology, 8(1): 19–32;  
11  
12 <https://doi.org/10.1080/1364557032000119616>  
13

14 31. Tricco AC, Lillie E, Zarin W, et al. 2018. PRISMA Extension for Scoping Reviews  
15  
16 (PRISMA-ScR): Checklist and Explanation. Annals of Internal Medicine, 169(7): 467-  
17  
18 473; <https://doi.org/10.7326/M18-0850>  
19  
20  
21  
22  
23  
24  
25  
26  
27  
28  
29  
30  
31  
32  
33  
34  
35  
36  
37  
38  
39  
40  
41  
42  
43  
44  
45  
46  
47  
48  
49  
50  
51  
52  
53  
54  
55  
56  
57  
58  
59  
60

## Preferred Reporting Items for Systematic reviews and Meta-Analyses extension for Scoping Reviews (PRISMA-ScR) Checklist

| SECTION                                               | ITEM | PRISMA-ScR CHECKLIST ITEM                                                                                                                                                                                                                                                                                  | REPORTED ON PAGE #    |
|-------------------------------------------------------|------|------------------------------------------------------------------------------------------------------------------------------------------------------------------------------------------------------------------------------------------------------------------------------------------------------------|-----------------------|
| <b>TITLE</b>                                          |      |                                                                                                                                                                                                                                                                                                            |                       |
| Title                                                 | 1    | Identify the report as a scoping review.                                                                                                                                                                                                                                                                   | 1                     |
| <b>ABSTRACT</b>                                       |      |                                                                                                                                                                                                                                                                                                            |                       |
| Structured summary                                    | 2    | Provide a structured summary that includes (as applicable): background, objectives, eligibility criteria, sources of evidence, charting methods, results, and conclusions that relate to the review questions and objectives.                                                                              | 2-3                   |
| <b>INTRODUCTION</b>                                   |      |                                                                                                                                                                                                                                                                                                            |                       |
| Rationale                                             | 3    | Describe the rationale for the review in the context of what is already known. Explain why the review questions/objectives lend themselves to a scoping review approach.                                                                                                                                   | 5-6                   |
| Objectives                                            | 4    | Provide an explicit statement of the questions and objectives being addressed with reference to their key elements (e.g., population or participants, concepts, and context) or other relevant key elements used to conceptualize the review questions and/or objectives.                                  | 7                     |
| <b>METHODS</b>                                        |      |                                                                                                                                                                                                                                                                                                            |                       |
| Protocol and registration                             | 5    | Indicate whether a review protocol exists; state if and where it can be accessed (e.g., a Web address); and if available, provide registration information, including the registration number.                                                                                                             | n/a                   |
| Eligibility criteria                                  | 6    | Specify characteristics of the sources of evidence used as eligibility criteria (e.g., years considered, language, and publication status), and provide a rationale.                                                                                                                                       | 8                     |
| Information sources*                                  | 7    | Describe all information sources in the search (e.g., databases with dates of coverage and contact with authors to identify additional sources), as well as the date the most recent search was executed.                                                                                                  | 8                     |
| Search                                                | 8    | Present the full electronic search strategy for at least 1 database, including any limits used, such that it could be repeated.                                                                                                                                                                            | 8 & Additional file 2 |
| Selection of sources of evidence†                     | 9    | State the process for selecting sources of evidence (i.e., screening and eligibility) included in the scoping review.                                                                                                                                                                                      | 9                     |
| Data charting process‡                                | 10   | Describe the methods of charting data from the included sources of evidence (e.g., calibrated forms or forms that have been tested by the team before their use, and whether data charting was done independently or in duplicate) and any processes for obtaining and confirming data from investigators. | 9                     |
| Data items                                            | 11   | List and define all variables for which data were sought and any assumptions and simplifications made.                                                                                                                                                                                                     | 9                     |
| Critical appraisal of individual sources of evidence§ | 12   | If done, provide a rationale for conducting a critical appraisal of included sources of evidence; describe the methods used and how this information was used in any data synthesis (if appropriate).                                                                                                      | n/a                   |

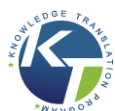

| SECTION                                       | ITEM | PRISMA-ScR CHECKLIST ITEM                                                                                                                                                                       | REPORTED ON PAGE # |
|-----------------------------------------------|------|-------------------------------------------------------------------------------------------------------------------------------------------------------------------------------------------------|--------------------|
| Synthesis of results                          | 13   | Describe the methods of handling and summarizing the data that were charted.                                                                                                                    | 10                 |
| <b>RESULTS</b>                                |      |                                                                                                                                                                                                 |                    |
| Selection of sources of evidence              | 14   | Give numbers of sources of evidence screened, assessed for eligibility, and included in the review, with reasons for exclusions at each stage, ideally using a flow diagram.                    | n/a                |
| Characteristics of sources of evidence        | 15   | For each source of evidence, present characteristics for which data were charted and provide the citations.                                                                                     | n/a                |
| Critical appraisal within sources of evidence | 16   | If done, present data on critical appraisal of included sources of evidence (see item 12).                                                                                                      | n/a                |
| Results of individual sources of evidence     | 17   | For each included source of evidence, present the relevant data that were charted that relate to the review questions and objectives.                                                           | n/a                |
| Synthesis of results                          | 18   | Summarize and/or present the charting results as they relate to the review questions and objectives.                                                                                            | n/a                |
| <b>DISCUSSION</b>                             |      |                                                                                                                                                                                                 |                    |
| Summary of evidence                           | 19   | Summarize the main results (including an overview of concepts, themes, and types of evidence available), link to the review questions and objectives, and consider the relevance to key groups. | n/a                |
| Limitations                                   | 20   | Discuss the limitations of the scoping review process.                                                                                                                                          | n/a                |
| Conclusions                                   | 21   | Provide a general interpretation of the results with respect to the review questions and objectives, as well as potential implications and/or next steps.                                       | 11                 |
| <b>FUNDING</b>                                |      |                                                                                                                                                                                                 |                    |
| Funding                                       | 22   | Describe sources of funding for the included sources of evidence, as well as sources of funding for the scoping review. Describe the role of the funders of the scoping review.                 | 18                 |

JBI = Joanna Briggs Institute; PRISMA-ScR = Preferred Reporting Items for Systematic reviews and Meta-Analyses extension for Scoping Reviews.

\* Where *sources of evidence* (see second footnote) are compiled from, such as bibliographic databases, social media platforms, and Web sites.

† A more inclusive/heterogeneous term used to account for the different types of evidence or data sources (e.g., quantitative and/or qualitative research, expert opinion, and policy documents) that may be eligible in a scoping review as opposed to only studies. This is not to be confused with *information sources* (see first footnote).

‡ The frameworks by Arksey and O'Malley (6) and Levac and colleagues (7) and the JBI guidance (4, 5) refer to the process of data extraction in a scoping review as data charting.

§ The process of systematically examining research evidence to assess its validity, results, and relevance before using it to inform a decision. This term is used for items 12 and 19 instead of "risk of bias" (which is more applicable to systematic reviews of interventions) to include and acknowledge the various sources of evidence that may be used in a scoping review (e.g., quantitative and/or qualitative research, expert opinion, and policy document).

From: Tricco AC, Lillie E, Zarin W, O'Brien KK, Colquhoun H, Levac D, et al. PRISMA Extension for Scoping Reviews (PRISMA-ScR): Checklist and Explanation. *Ann Intern Med.* 2018;169:467–473. doi: 10.7326/M18-0850.

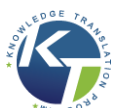

St. Michael's

Inspired Care.  
Inspiring Science.

For peer review only - <http://bmjopen.bmj.com/site/about/guidelines.xhtml>



1  
2  
3 **Database: PubMed**  
4  
5  
6  
7

| Search | Query                                                                                                                                                                                                                                                                                                                                                                                                                                                                                                                                                                                                                                                                                                                                        |
|--------|----------------------------------------------------------------------------------------------------------------------------------------------------------------------------------------------------------------------------------------------------------------------------------------------------------------------------------------------------------------------------------------------------------------------------------------------------------------------------------------------------------------------------------------------------------------------------------------------------------------------------------------------------------------------------------------------------------------------------------------------|
| #3     | Search: #1 AND #2                                                                                                                                                                                                                                                                                                                                                                                                                                                                                                                                                                                                                                                                                                                            |
| #2     | Search: health policy[mh] OR policy maker[tiab] OR policy makers[tiab] OR policymaker[tiab] OR policymakers[tiab] OR policy making[tiab] OR policymaking[tiab] OR decision making[mh] OR decision making[tiab] OR decisionmaking[tiab] OR decision maker[tiab] OR decision makers[tiab] OR stakeholder[tiab] OR stakeholders[tiab]                                                                                                                                                                                                                                                                                                                                                                                                           |
| #1     | Search: translational medical research[mh] OR translational medical research[tiab] OR translational medical science[tiab] OR medical translational research[tiab] OR translational medicine[tiab] OR knowledge translation[tiab] OR translational research[tiab] OR evidence-informed[tiab] OR evidence brief[tiab] OR evidence briefs[tiab] OR policy brief[tiab] OR policy briefs[tiab] OR deliberative dialogue[tiab] OR deliberative dialogues[tiab] OR knowledge synthesis[tiab] OR knowledge syntheses[tiab] OR knowledge transfer[tiab] OR research uptake[tiab] OR evidence summary[tiab] OR evidence summaries[tiab] OR knowledge uptake[tiab] OR knowledge exchange[tiab] OR research to action[tiab] OR knowledge to action[tiab] |

# BMJ Open

## Characteristics of knowledge translation platforms and methods for evaluating them: a scoping review protocol

|                                 |                                                                                                                                                                                                                                                                                                                                                                                                                                                                                                   |
|---------------------------------|---------------------------------------------------------------------------------------------------------------------------------------------------------------------------------------------------------------------------------------------------------------------------------------------------------------------------------------------------------------------------------------------------------------------------------------------------------------------------------------------------|
| Journal:                        | <i>BMJ Open</i>                                                                                                                                                                                                                                                                                                                                                                                                                                                                                   |
| Manuscript ID                   | bmjopen-2022-061185.R2                                                                                                                                                                                                                                                                                                                                                                                                                                                                            |
| Article Type:                   | Protocol                                                                                                                                                                                                                                                                                                                                                                                                                                                                                          |
| Date Submitted by the Author:   | 13-May-2022                                                                                                                                                                                                                                                                                                                                                                                                                                                                                       |
| Complete List of Authors:       | Schmidt, B; University of the Western Cape Faculty of Community and Health Sciences, School of Public Health<br>Cooper, Sara ; South African Medical Research Council, Cochrane South Africa<br>Young, Taryn; Stellenbosch University, Centre for Evidence-based Health Care, Faculty of Medicine and Health Sciences<br>Jessani, Nasreen S.; Stellenbosch University, Centre for Evidence-based Health Care; Johns Hopkins Bloomberg School of Public Health, Department of International Health |
| <b>Primary Subject Heading</b>: | Health policy                                                                                                                                                                                                                                                                                                                                                                                                                                                                                     |
| Secondary Subject Heading:      | Public health                                                                                                                                                                                                                                                                                                                                                                                                                                                                                     |
| Keywords:                       | Health policy < HEALTH SERVICES ADMINISTRATION & MANAGEMENT, Public health < INFECTIOUS DISEASES, Organisational development < HEALTH SERVICES ADMINISTRATION & MANAGEMENT                                                                                                                                                                                                                                                                                                                        |
|                                 |                                                                                                                                                                                                                                                                                                                                                                                                                                                                                                   |

SCHOLARONE™  
Manuscripts

# Characteristics of knowledge translation platforms and methods for evaluating them: a scoping review protocol

Bey-Marrié Schmidt<sup>1\*</sup> (PhD), Sara Cooper<sup>2</sup> (PhD), Taryn Young<sup>3</sup> (PhD), Nasreen S. Jessani<sup>3,4</sup> (Dr PH)

<sup>1</sup>School of Public Health, Faculty of Community and Health Sciences, University of the Western Cape, South Africa

<sup>2</sup>Cochrane South Africa, South African Medical Research Council, South Africa

<sup>3</sup>Centre for Evidence-based Health Care, Division of Epidemiology and Biostatistics, Faculty of Medicine and Health Sciences, Stellenbosch University, South Africa

<sup>4</sup>Department of International Health, Johns Hopkins Bloomberg School of Public Health, Baltimore, USA

## \*Corresponding Author:

Bey-Marrié Schmidt, [bschmidt@uwc.ac.za](mailto:bschmidt@uwc.ac.za), School of Public Health, Faculty of Community Health Sciences, University of the Western Cape, Robert Sobukwe Road, Bellville 7535, South Africa

Abstract word count: 331

Text word count: 1958

## Abstract

### Introduction

Knowledge translation platforms (KTPs) are intermediary organisations, initiatives or networks whose intent is to bridge the evidence into action divide. Strategies and tools include collaborative knowledge production, capacity building, information exchange and dialogue to facilitate relevant and timely engagement between researchers and decision-makers and other relevant stakeholders. With the wide range of definitions and descriptions of KTPs, there is a need to (a) provide a nuanced understanding of characteristics of KTPs and (b) assess and consolidate research methods used in mapping and evaluating KTPs to inform standardised process and impact evaluation.

### Methods and analysis

This scoping review will follow the recommended and accepted methods for scoping reviews and reporting guidelines. Eligibility for inclusion is: any conceptual or empirical health-related qualitative, quantitative and/or mixed method studies including (a) definitions, descriptions and models or frameworks of KTPs (including those that do not self-identify as KTPs, e.g. university research centres) and (b) research methods for mapping and/or evaluating KTPs. Searches will be carried out in PubMed, Scopus, CINAHL, EMBASE, Global Health and Web of Science using a pre-determined search strategy, without any date, language or geographic restrictions. Two reviewers will independently screen titles and abstracts. One reviewer will complete data extraction for all included studies, and another will check a sample of 50% of the included studies. The analysis and synthesis will provide: (a) an understanding of the various characteristics of KTPs; b) insight into characteristics or factors that make them resilient and/or adaptive to facilitate

1  
2  
3 impact (i.e. influence policy and practice); and (c) an overview of the various methods for mapping  
4 and evaluating KTPs. We will explore enhancing an existing framework for classifying KTPs, or  
5 perhaps even developing a new framework for identifying and monitoring KTPs if necessary and  
6 relevant.  
7  
8  
9  
10  
11  
12  
13  
14

### 15 **Ethics and dissemination**

16  
17 This scoping review does not require ethics approval, as we will only include information from  
18 previously conducted studies and we will not involve human participants. The results will be  
19 submitted to a peer-reviewed scientific journal for publication and as conference presentations.  
20  
21  
22  
23  
24  
25  
26  
27  
28

### 29 **Keywords**

30  
31 Knowledge translation platform, knowledge broker, intermediary, evidence-informed decision-  
32 making.  
33  
34  
35  
36  
37  
38  
39  
40  
41  
42  
43  
44  
45  
46  
47  
48  
49  
50  
51  
52  
53  
54  
55  
56  
57  
58  
59  
60

## Strengths and limitations of this study

- This scoping review will identify different qualitative, quantitative and mixed methods that can be used or combined to develop robust evaluations of KTPs.
- The analysis and synthesis will guide the review authors in enhancing an existing framework for classifying KTPs, or developing a new framework for identifying and monitoring KTPs if necessary and relevant.
- This scoping review will include a consultation of authors of included studies and/or experts in the field, as well as other KT researchers and practitioners, to ensure its relevance and applicability.

## Background

The global focus on achieving the Sustainable Development Goals (SDGs) and implementing Universal Health Coverage (UHC) has resulted in an increased demand for research evidence to inform policy and practice (1, 2). SDG 3 is about ensuring healthy lives and promoting wellbeing at all ages, which is closely linked with the aims of UHC (3). Universal health coverage aims to ensure that all people have access to needed and effective health services (including prevention, promotion, treatment, rehabilitation and palliation) of sufficient quality, without exposing users to financial hardship (4). However, despite the widely agreed SDGs and the UHC model, there is limited use of high-quality research on the effectiveness, acceptability and cost implications of health system, healthcare or public health interventions to inform policy, practice and implementation (5). Although research evidence on health-related interventions and systems are increasingly available, there are challenges around translating research evidence into policy and practice (5, 6, 7, 8).

Translating research evidence into policy and practice, or knowledge translation (KT), entails a “dynamic and iterative process that includes synthesis, dissemination, exchange and ethically sound application of knowledge to improve health, provide more effective health services and products and strengthen the healthcare system” (9). Limited institutional support and/or buy-in from leadership and relevant stakeholders for KT has been linked to several challenges (10, 11, 12, 13, 14), for example: poor infrastructure and inadequate financial and technical resources specifically for KT; inadequate soft skills, relationships and networks amongst evidence producers; evidence users’ negative attitudes and poor knowledge about what KT is and how to

1  
2  
3 do it; and scarce local research evidence relevant to micro-level policy and practice; amongst  
4  
5 others (10, 11, 12, 13, 14).  
6  
7  
8  
9

10 KT platforms (KTPs) are intermediary organisations, initiatives or networks whose intent is to  
11  
12 overcome a range of inter-relationship and contextual challenges (see examples above) using a  
13  
14 multitude of strategies and tools (15, 16). These include collaborative knowledge production,  
15  
16 capacity building, information exchange and dialogue to facilitate relevant and timely engagement  
17  
18 between researchers and different health decision-makers (e.g. patients, health practitioners, health  
19  
20 care managers, policy-makers and funders). There are currently a wide range of definitions and  
21  
22 descriptions (17-27) as well as models and frameworks (28, 29) of KTPs in the literature. But there  
23  
24 is only one published systematic review on KTPs by Partridge et al., which primarily synthesised  
25  
26 the lessons learned about activities, outputs, outcomes and impacts from KTPs specifically in  
27  
28 LMICs (30).  
29  
30  
31  
32  
33  
34

35 Firstly, there is a need to synthesise the different definitions and descriptions of KTPs in the  
36  
37 literature so as to provide a common and nuanced understanding of what KTPs are. This is  
38  
39 necessary for planning and carrying out comparisons and evaluations of KTPs, as one mechanism  
40  
41 for strengthening their overall usefulness. Secondly, there is a need to synthesise a wider range of  
42  
43 characteristics of KTPs beyond those characteristics explored in the Partridge review; for example:  
44  
45 strengths and limitations of different KTP models, funding and sustainability of KTPs, current  
46  
47 operational status (determined using evidence from the scoping review and institutional websites),  
48  
49 and the relationship between design and implementation factors or characteristics and successful  
50  
51 functioning of KTPs and their influence to policy and practice. Having a better understanding of  
52  
53  
54  
55  
56  
57  
58  
59  
60



1  
2  
3 the different characteristics and types of KTPs can inform funders and governments about their  
4 implementation, sustainability and overall support for evidence-informed policy and practice.  
5  
6 Additionally, identifying the different types of KTPs that can support evidence-informed policy  
7 and practice in local settings is critical, especially in the context of many public health and health  
8 system interventions for achieving UHC and the SDGs. For example, in the case that a KTP exists  
9 at the local level, decision-makers need to understand what KTPs are (including what KT is in  
10 general) and their role in supporting UHC decision-making processes. And thirdly, there is a need  
11 to synthesise the research methods used in the literature for mapping and evaluating KTPs.  
12 Identifying the different qualitative, quantitative and mixed methods used for mapping and  
13 evaluating KTPs is an important step in exploring how different methods can be used or combined  
14 to address the gap for more robust evaluations of KTPs. At a practical level, mapping KTPs can  
15 help like-minded organisations to identify opportunities that avoid duplication and amplify  
16 collaboration, particularly in settings where there are limited resources and expertise.  
17  
18  
19  
20  
21  
22  
23  
24  
25  
26  
27  
28  
29  
30  
31  
32  
33  
34

35 This scoping review therefore aims (a) provide a more nuanced understanding of the characteristics  
36 of KTPs and (b) assess and consolidate research methods used in mapping and evaluating KTPs  
37 to inform standardised process and impact evaluation. The review authors intend to use the review  
38 findings to inform a future research study on mapping, evaluating and strengthening KTPs that  
39 can support UHC policy, practice and implementation in South Africa.  
40  
41  
42  
43  
44  
45  
46  
47  
48  
49  
50  
51  
52  
53  
54  
55  
56  
57  
58  
59  
60

## Identifying the research questions

This scoping review is on the characteristics and methods for mapping and evaluating KTPs. The specific objectives of the scoping review are:

- To identify and synthesise definitions as well as characteristics of KTPs (for example: activities, processes, outputs, purpose, functions, models, stakeholders, positioning, funding, strengths, limitations, monitoring, impact and status);
- To identify and synthesise the design and implementation factors or characteristics that facilitate and/or hinder the successful functioning of KTPs and their influence to policy and practice;
- To identify and summarise the various research methods for mapping and evaluating KTPs (that is: qualitative, quantitative and mixed), and where evaluations were conducted, to synthesise their outcomes (e.g. impact, success or failure); and
- To explore the potential for developing a new or enhancing an existing framework for classifying KTPs.

## Identifying relevant studies

We will use the scoping review methods outlined by Arksey and O'Malley (31). The proposed steps are: identifying the research question; identifying relevant studies; study selection; charting the data; collating, summarising and reporting the results; and consultation (i.e. seeking insights beyond those in the literature from content experts). To report our review findings, we will follow

1  
2  
3 the PRISMA Extension for Scoping Reviews (PRISMA-ScR): Checklist and Explanation (see  
4  
5 **Supplementary File 1**) (30). We aim to conduct the proposed steps by February 2023.  
6  
7  
8  
9

10 Any published, empirical and conceptual, health research studies from anywhere on KTPs will be  
11 eligible. Qualitative, quantitative and/or mixed method studies are eligible for inclusion as long as  
12 they include a definition or description of what a KTP is and/or include one or more methods for  
13 mapping and/or evaluating KTPs. Eligible participants are KTP staff and users, e.g. researchers,  
14 knowledge brokers, policy-makers, health practitioners and managers, patients and community  
15 representatives, and journalists. KTPs can exist within and between different settings, e.g.  
16 universities, research councils, professional bodies, civil society organisations, community  
17 organisations and government (15, 16).  
18  
19  
20  
21  
22  
23  
24  
25  
26  
27  
28  
29  
30

31 The search will identify all relevant studies without data, language or geographic restrictions. We  
32 will search the following electronic databases: PubMed, Scopus, CINAHL, EMBASE, Global  
33 Health and Web of Science. Search strings will include keywords and Medical Subject Headings  
34 (MeSH) terms related to knowledge translation platform (concept A) (e.g. policy brief, deliberate  
35 dialogue, knowledge exchange) and evidence-informed decision-making (concept B) (e.g. health  
36 policy, policymaking). We have developed a preliminary search strategy in the PubMed database  
37 (see **Supplementary File 2**). To finalise our search strategy, we will apply an iterative approach  
38 to check whether known articles that meet our eligibility criteria were found by the search. We  
39 will also identify missing keywords and MeSH terms to add to our search strategy from the  
40 iterative process. In addition to the electronic searches, review authors will search the reference  
41  
42  
43  
44  
45  
46  
47  
48  
49  
50  
51  
52  
53  
54  
55  
56  
57  
58  
59  
60

1  
2  
3 lists of all included studies and key references (for example, relevant systematic reviews) and (b)  
4  
5 contact authors of included studies and/or experts in the field for additional references.  
6  
7  
8  
9

## 10 **Study selection**

11  
12  
13  
14

15 The search across databases will identify titles and abstracts of relevant studies. The search results  
16 will be merged in the Endnote reference management programme where duplicates will be  
17 removed. The titles and abstracts will then be uploaded to an electronic programme, such as  
18 Covidence or Rayyan, for screening and data extraction. An eligibility form will be developed  
19 before screening starts. The following inclusion criteria will be used:  
20  
21  
22  
23  
24  
25  
26  
27  
28

### 29 Focus of studies:

30

- 31 • definitions and characteristics of KTPs (e.g. activities, processes, outputs, purpose,  
32 functions, models, stakeholders, positioning, funding, strengths, limitations, monitoring,  
33 impact and status)  
34  
35
- 36 • factors or characteristics that facilitate and/or hinder the successful functioning of KTPs  
37 and their influence to policy and practice  
38  
39
- 40 • research methods for mapping and evaluating KTPs (that is: qualitative, quantitative and  
41 mixed)  
42  
43
- 44 • evaluation outcomes of KTPs (e.g. impact, success or failure); and  
45  
46
- 47 • existing frameworks for classifying KTPs  
48  
49  
50  
51  
52  
53  
54  
55  
56  
57  
58  
59  
60

1  
2  
3 The outcomes of KTPs (success or failure) will be based on what the KTPs themselves aim to  
4 achieve through their activities and processes. Where a KTP has been evaluated, the review team  
5 will use the evaluation results to determine which factors or characteristics contributed to its  
6 success or challenges. Where a KTP has not been evaluated, the review team will explore what the  
7 primary authors deem as important factors or characteristics that facilitate and/or hinder its  
8 successful functioning and influence on policy and practice  
9  
10  
11  
12  
13  
14  
15  
16  
17  
18

19 Participants:

- 20 • KTP staff and users (e.g. researchers, knowledge brokers, policy-makers, health  
21 practitioners and managers, patients and community representatives, and journalists).

22  
23  
24  
25  
26  
27  
28 Setting:

- 29 • KTPs can exist within and between different settings (e.g. research centres or departments,  
30 universities, research councils, professional bodies, civil society organisations, community  
31 organisations and government).

32  
33  
34  
35  
36  
37  
38  
39  
40 Two review authors will independently screen the titles and abstracts to determine their eligibility  
41 for full-text screening. We will retrieve full-texts for titles and abstracts deemed relevant. One  
42 review author (BMS) will screen all full-texts and make a final decision about inclusion. Another  
43 review author will check the eligibility of a random sample of 50% of the full-texts. Conflicts will  
44 be resolved with a third reviewer. The study selection process will be summarised using a Preferred  
45 Reporting Items for Systematic Reviews and Meta-Analyses (PRISMA) flow diagram.  
46  
47  
48  
49  
50  
51  
52  
53  
54  
55  
56  
57

## Charting the data

Data extraction or ‘charting of data’ will be carried out once we have a final list of all the studies to be included in the review. Data extraction will be conducted by one review author (BMS) who will collect, sift and sort data according to the objectives. The review author will extract information on the study and author details; research type and study design; research setting and participants; definitions, descriptions and characteristics of KTPs; and methods used for mapping and/or evaluating KTPs. A second review author will check data extraction of all included studies. Data extraction will be done in Excel to allow for comparison of key items across studies and to allow for synthesis within and across data items. Once all the data has been extracted and checked, studies will be categorised or ‘charted’ according to the following criteria: (a) what is a KTP? And/or (b) what methods are used to map and/or evaluate a KTP? Additional categories may be identified during the data extraction process, in consultation with the review team. We will not assess the methodological quality of the included studies, as that is the convention for such scoping reviews (29, 30).

## Collating, summarising, and reporting the results

One review author (BMS) will conduct data analysis using manual coding and data synthesis methods on the extracted and charted data. A second review author will check the data analysis work on an ongoing basis to ensure quality of the process. We will synthesise the data according to variation (breadth) and key components (depth) across definitions, characteristics and methods of KTPs. The analysis will combine quantitative and qualitative syntheses to provide an overview

1  
2  
3 of our findings. First, we will conduct a numerical analysis of all the included studies according to  
4 different categories, e.g. study design (qualitative, quantitative, mixed), participants (KTP staff  
5 versus users), KTP characteristics (model, function, institution), income level of country (low,  
6 middle and high). Second, we will conduct a qualitative narrative synthesis of the definitions,  
7 characteristics and methods of KTPs by looking for the key components across the data. The  
8 numerical and narrative syntheses will provide (a) an overview of the key aspects of KTP studies,  
9 (b) definitions and conceptualisations of KTPs, and (c) research methods for mapping and/or  
10 evaluating KTPs.  
11  
12  
13  
14  
15  
16  
17  
18  
19  
20  
21  
22  
23

## 24 **Consultations**

25  
26  
27  
28  
29 As mentioned earlier, to identify additional relevant studies, we will contact authors of included  
30 studies and/or experts in the field. We will engage with other KT researchers (i.e. those undertaking  
31 scientific research in the KT field) and KT practitioners (i.e. those designing, implementing,  
32 monitoring and evaluating KT interventions) as we carry out different stages of this scoping review  
33 to ensure its relevance and applicability. It is an advantage that our review team is made up of both  
34 KT researchers and practitioners who have the appropriate content and methods expertise to ensure  
35 scientific rigour of the review. We will shape the review process and findings according what we  
36 know is most useful from experience, and also draw on colleagues working in the field to validate  
37 the findings and extract key messages or implications for research and practice.  
38  
39  
40  
41  
42  
43  
44  
45  
46  
47  
48  
49  
50  
51  
52  
53  
54  
55  
56  
57  
58  
59  
60

## Patient and Public Involvement

There was no patient or public involvement in the design of this protocol.

## Discussion

To our knowledge, this is the first scoping review of the evidence on KTPs globally. Our synthesis will be on the wide range of definitions, descriptions and characteristics of KTPs and aims to provide a better understanding of the relationship between some of the characteristics of KTPs (for example, we will explore the relationship between KTP design, success factors and effectiveness or impact). A key methodological strength of the scoping review is that we will scope for both conceptual and empirical studies, using any study design, and without applying any date, language or geographic restrictions.

Mapping KTPs in this scoping review can help researchers and other stakeholders leading KTPs identify opportunities for collaborating with other KTPs in their local setting or globally. Collaborations amongst KTPs can potentially reduce duplication of efforts and optimise the use of already-limited resources and expertise to effectively engage decision-makers. Additionally, a synthesis of the characteristics of KTPs can help researchers and other stakeholders leading KTPs compare and evaluate the usefulness and effectiveness of different KTPs in relation to theirs. Evidence on the usefulness and effectiveness of KTPs, areas of improvement and the gaps in research can guide government and funding agencies' agendas. Further, the review findings can help decision-makers identify KTPs to collaborate with and provide them with an understanding



1  
2  
3 of how KTPs can support decision-making processes. Lastly, the synthesis will guide review  
4 authors in developing a matrix or framework for classifying KTPs and inform the design of a future  
5 study to map and evaluate KTPs that can support UHC policy, practice and implementation in  
6 South Africa.  
7  
8  
9  
10  
11  
12  
13  
14

## 15 **Ethics and dissemination**

16  
17  
18  
19  
20 This is a scoping review of completed studies. As such, our research does not require ethics  
21 approval, as we do not involve human participants. The results will be submitted to a peer-  
22 reviewed scientific journal for publication and as conference presentations.  
23  
24  
25  
26  
27  
28  
29

## 30 **Contributions**

31  
32 BMS conceptualised the protocol together with TY and NJ. BMS drafted the protocol with SC and  
33 TY providing methodological expertise and NJ content expertise. All authors reviewed and  
34 approved the final manuscript before final submission for peer review.  
35  
36  
37  
38  
39  
40  
41

## 42 **Funding**

43  
44 Research reported in this publication was supported by the South African Medical Research  
45 Council (SAMRC) through its Division of Research Capacity Development under the Research  
46 Capacity Development Initiative from funding received from the South African National Treasury.  
47  
48  
49 The content and findings reported or illustrated are the sole deduction, view and responsibility of  
50 the researcher and do not reflect the official position and sentiments of the SAMRC.  
51  
52  
53  
54  
55  
56  
57  
58  
59  
60

## Competing interests

The authors declare that they have no competing interests.

## Data sharing statement

Unpublished study data, such as the final search strategies, will be made available in the review publication and/or upon request from the corresponding author.

## Acknowledgements

We would like to thank Mrs. Joy Oliver, Cochrane South Africa, South African Medical Research Council, who assisted with developing the search strategy.

## References

1. Special Programme for Research and Training in Tropical Diseases (TDR). 2019. Promoting implementation research for accelerating universal health coverage. <https://www.who.int/tdr/news/2019/promoting-ir-for-accelerating-uhc/en/>
2. Eichler R, Gigli S, LeRoy L. 2018. Implementation Research to Strengthen Health Care Financing Reforms Toward Universal Health Coverage in Indonesia: A Mixed-Methods Approach to Real-World Monitoring. *Global Health: Science and Practice*, 6(4): 747-753; <https://doi.org/10.9745/GHSP-D-18-00328>
3. United Nations (UN). 2019. Take action for the Sustainable Development Goals. <https://www.un.org/sustainabledevelopment/sustainable-development-goals/>

- 1  
2  
3 4. World Health Organisation. 2020. What is health financing for universal coverage?  
4  
5 [https://www.who.int/health\\_financing/universal\\_coverage\\_definition/en/](https://www.who.int/health_financing/universal_coverage_definition/en/)  
6
- 7  
8 5. Uneke C, Ndukwe C, Ezeoha A, Uro-Chukwu H, Ezeonu C. 2015. Implementation of a  
9  
10 Health Policy Advisory Committee as a Knowledge Translation Platform: The Nigeria  
11  
12 Experience. *International Journal of Health Policy and Management*, 4(3): 161-168;  
13  
14 <https://dx.doi.org/10.15171/ijhpm.2015.21>  
15
- 16  
17 6. Langlois EV, Becerril Montekio V, Young T, Song K, Alcalde-Rabanal J, Tran N. 2016.  
18  
19 Enhancing evidence informed policymaking in complex health systems: lessons from  
20  
21 multi-site collaborative approaches. *Health Research Policy Systems*, 14(20);  
22  
23 <https://dx.doi.org/10.1186/s12961-016-0089-0>  
24
- 25  
26 7. Mathews C, Goga A, Loveday M, Zembe W, Daviaud E, Siegfried N, Lewin S. 2018.  
27  
28 Moving towards universal health coverage: Strengthening the evidence ecosystem for the  
29  
30 South African health system. *South African Medical Journal (Research)*, 109(1);  
31  
32 <https://dx.doi.org/10.7196/SAMJ.2019.v109i11b.14245>  
33
- 34  
35 8. Young T, Garner P, Clarke M, Volmink J. 2017. Series: Clinical Epidemiology in South  
36  
37 Africa. Paper 1: Evidence-based health care and policy in Africa: past, present, and future.  
38  
39 *Journal of Clinical Epidemiology*, 8(2017); <https://doi.org/10.1016/j.jclinepi.2016.06.006>  
40
- 41  
42 9. Straus SE, Tetroe J, Graham I. 2009. Defining knowledge translation. *Canadian Medical*  
43  
44 *Association Journal*, 181(3-4): 165-168; <https://doi.org/10.1503/cmaj.081229>  
45
- 46  
47 10. Kalbarczyk A, Rodriguez DC, Mahendradhata Y, Sarker M, Seme A, Majumdar P,  
48  
49 Akinyemi OO, Kayembe P, Alonge OO. 2021. Barriers and facilitators to knowledge  
50  
51 translation activities within academic institutions in low- and middle-income countries.  
52  
53 *Health Policy and Planning*, 00; <https://doi.org/10.1093/heapol/czaa188>  
54  
55

- 1  
2  
3 11. Jessani NS, Siddiqi SM, Babcock C, Davey-Rothwell M, Ho S, Holtgrave DR. 2018.  
4  
5 Factors affecting engagement between academic faculty and decision-makers: learnings  
6  
7 and priorities for a school of public health. *Health Research Policy and Systems*, 16(65);  
8  
9 <https://doi.org/10.1186/s12961-018-0342-9>  
10  
11
- 12 12. Jessani NS, Babcock C, Siddiqi S, Davey-Rothwell M, Ho S, Holtgrave DR. 2018.  
13  
14 Relationships between public health faculty and decision makers at four governmental  
15  
16 levels: a social network analysis. *Evidence & Policy: A Journal of Research, Debate and*  
17  
18 *Practice*, 14(3); <https://doi.org/10.1332/174426418X15230282334424>  
19  
20
- 21 13. Malla C, Aylward P, Ward P. Knowledge translation for public health in low- and  
22  
23 middle- income countries: a critical interpretive synthesis. 2018. *Global Health Research*  
24  
25 *Policy*, 3 (1); <https://doi.org/10.1186/s41256-018-0084-9>  
26  
27
- 28 14. Mahendradhata Y, Kalbarczyk A. 2021. Prioritizing knowledge translation in low- and  
29  
30 middle-income countries to support pandemic response and preparedness. *Health*  
31  
32 *Research Policy Systems*, 19 (1); <https://doi.org/10.1186/s12961-020-00670-1>  
33  
34
- 35 15. Partridge ACR, Mansilla C, Randhawa H, et al. 2020. Lessons learned from descriptions  
36  
37 and evaluations of knowledge translation platforms supporting evidence-informed policy-  
38  
39 making in low- and middle-income countries: a systematic review. *Health Research*  
40  
41 *Policy Systems*, 18 (1); <https://doi.org/10.1186/s12961-020-00626-5>  
42  
43
- 44 16. Johnson NA, Lavis JN. 2010. *Procedures Manual for Evaluating Knowledge Translation*  
45  
46 *Platforms in Low- and Middle Income Countries*. McMaster University Program in  
47  
48 *Policy Decision-Making*; <http://hdl.handle.net/10625/49084>  
49  
50  
51  
52  
53  
54  
55  
56  
57

- 1  
2  
3 17. Orton L, Lloyd-Williams F, Taylor-Robinson D, O'Flaherty M, Capewell S. 2011. The  
4 use of research evidence in public health decision making processes: systematic review.  
5 PLoS One, 6(7); <https://doi.org/10.1371/journal.pone.0021704>  
6  
7  
8  
9  
10 18. Young T, Shearer JC, Naude C, Kredt T, Wiysonge CS, Garner P. Researcher and  
11 policymaker dialogue: the Policy BUDDIES Project in Western Cape Province, South  
12 Africa. 2018. BMJ Global Health, 3(6); <http://dx.doi.org/10.1136/bmjgh-2018-001130>  
13  
14  
15  
16  
17 19. Kothari A, MacLean L, Edwards N. 2009. Increasing capacity for knowledge translation:  
18 understanding how some researchers engage policy makers. Evidence & Policy: A  
19 Journal of Research, Debate and Practice, 8(1):1-21;  
20  
21  
22  
23  
24  
25  
26 20. Berman J, Mitambo C, Matanje-Mwagomba B, Khan S, Kachimanga C, Wroe E, et al.  
27 2015. Building a knowledge translation platform in Malawi to support evidence-informed  
28 health policy. Health Research Policy and Systems, 13(73);  
29  
30  
31  
32  
33  
34  
35 21. Cheung A, Lavis JN, Hamandi A, El-Jardali F, Sachs J, Sewankambo N, Knowledge-  
36 Translation Platform Evaluation Team. 2011. Climate for evidence-informed health  
37 systems: A print media analysis in 44 low- and middle-income countries that host  
38 knowledge-translation platforms. Health Research Policy Systems, 9 (1);  
39  
40  
41  
42  
43  
44  
45  
46  
47 22. El-Jardali F, Ataya N, Jamal D, et al. 2012. A multi-faceted approach to promote  
48 knowledge translation platforms in eastern Mediterranean countries: climate for  
49 evidence-informed policy. Health Research Policy Systems, 10 (1);  
50  
51  
52  
53  
54  
55  
56  
57  
58  
59  
60

- 1  
2  
3 23. Kasonde JM, Campbell S. 2012. Creating a Knowledge Translation Platform: nine  
4 lessons from the Zambia Forum for Health Research. *Health Research Policy and*  
5 *Systems*, 10 (1); <https://doi.org/10.1186/1478-4505-10-31>  
6  
7  
8  
9  
10 24. Ongolo-Zogo P, Lavis JN, Tomson G, Sewankambo NK. 2018. Assessing the influence  
11 of knowledge translation platforms on health system policy processes to achieve the  
12 health millennium development goals in Cameroon and Uganda: a comparative case  
13 study. *Health Policy Plan*, 33(4): 539-554; <https://doi.org/10.1093/heapol/czx194>  
14  
15  
16  
17  
18 25. Poldrugovac M, Kuchenmüller T, Dobrin PT, Ivanuša M. 2016. The evidence-informed  
19 policy-making context in Slovenia: groundwork for a knowledge translation platform.  
20 *Public Health Panorama*, 2(3): 313-318; <https://apps.who.int/iris/handle/10665/325376>  
21  
22  
23  
24 26. Scarlett J, Köhler K, Reinap M. Evidence-informed Policy Network (EVIPNet) Europe:  
25 success stories in knowledge translation. *Public Health Panorama*, 4(02): 161-169;  
26  
27 <https://apps.who.int/iris/handle/10665/325029>  
28  
29  
30  
31  
32 27. Pettman TL, Armstrong R, Waters E, et al. 2016. Evaluation of a knowledge translation  
33 and exchange platform to advance non-communicable disease prevention. *Evidence and*  
34 *Policy*, 12(1): 109-126; <http://dx.doi.org/10.1332/204674315X14297901956276>  
35  
36  
37  
38  
39 28. Bennett G, Jessani N (Editors). 2011. *The Knowledge Translation Toolkit: Bridging the*  
40 *Know–Do Gap: A Resource for Researchers*. Sage Publications, International  
41 *Development Research Centre*; [https://www.idrc.ca/en/book/knowledge-translation-](https://www.idrc.ca/en/book/knowledge-translation-toolkit-bridging-know-do-gap-resource-researchers)  
42 [toolkit-bridging-know-do-gap-resource-researchers](https://www.idrc.ca/en/book/knowledge-translation-toolkit-bridging-know-do-gap-resource-researchers)  
43  
44  
45  
46  
47  
48 29. Pettman TL, Armstrong R, Johnson S, Love P, Gill T, Coveney J, Swinburn B, Allender  
49 S. 2020. Evaluation outcomes of a knowledge translation platform: a structure for support  
50  
51  
52  
53  
54  
55  
56  
57  
58  
59  
60

1  
2  
3 and exchange in prevention. Evidence & Policy: A Journal of Research, Debate and  
4  
5 Practice, 16(1): 99-12; <https://doi.org/10.1332/174426418X15260526569269>  
6

7  
8 30. Arksey H, O'Malley L. 2005. Scoping studies: towards a methodological framework.  
9  
10 International Journal of Social Research Methodology, 8(1): 19–32;  
11  
12 <https://doi.org/10.1080/1364557032000119616>  
13

14  
15 31. Tricco AC, Lillie E, Zarin W, et al. 2018. PRISMA Extension for Scoping Reviews  
16  
17 (PRISMA-ScR): Checklist and Explanation. Annals of Internal Medicine, 169(7): 467-  
18  
19 473; <https://doi.org/10.7326/M18-0850>  
20  
21  
22  
23  
24  
25  
26  
27  
28  
29  
30  
31  
32  
33  
34  
35  
36  
37  
38  
39  
40  
41  
42  
43  
44  
45  
46  
47  
48  
49  
50  
51  
52  
53  
54  
55  
56  
57  
58  
59  
60

## Preferred Reporting Items for Systematic reviews and Meta-Analyses extension for Scoping Reviews (PRISMA-ScR) Checklist

| SECTION                                               | ITEM | PRISMA-ScR CHECKLIST ITEM                                                                                                                                                                                                                                                                                  | REPORTED ON PAGE #    |
|-------------------------------------------------------|------|------------------------------------------------------------------------------------------------------------------------------------------------------------------------------------------------------------------------------------------------------------------------------------------------------------|-----------------------|
| <b>TITLE</b>                                          |      |                                                                                                                                                                                                                                                                                                            |                       |
| Title                                                 | 1    | Identify the report as a scoping review.                                                                                                                                                                                                                                                                   | 1                     |
| <b>ABSTRACT</b>                                       |      |                                                                                                                                                                                                                                                                                                            |                       |
| Structured summary                                    | 2    | Provide a structured summary that includes (as applicable): background, objectives, eligibility criteria, sources of evidence, charting methods, results, and conclusions that relate to the review questions and objectives.                                                                              | 2-3                   |
| <b>INTRODUCTION</b>                                   |      |                                                                                                                                                                                                                                                                                                            |                       |
| Rationale                                             | 3    | Describe the rationale for the review in the context of what is already known. Explain why the review questions/objectives lend themselves to a scoping review approach.                                                                                                                                   | 5-6                   |
| Objectives                                            | 4    | Provide an explicit statement of the questions and objectives being addressed with reference to their key elements (e.g., population or participants, concepts, and context) or other relevant key elements used to conceptualize the review questions and/or objectives.                                  | 7                     |
| <b>METHODS</b>                                        |      |                                                                                                                                                                                                                                                                                                            |                       |
| Protocol and registration                             | 5    | Indicate whether a review protocol exists; state if and where it can be accessed (e.g., a Web address); and if available, provide registration information, including the registration number.                                                                                                             | n/a                   |
| Eligibility criteria                                  | 6    | Specify characteristics of the sources of evidence used as eligibility criteria (e.g., years considered, language, and publication status), and provide a rationale.                                                                                                                                       | 8                     |
| Information sources*                                  | 7    | Describe all information sources in the search (e.g., databases with dates of coverage and contact with authors to identify additional sources), as well as the date the most recent search was executed.                                                                                                  | 8                     |
| Search                                                | 8    | Present the full electronic search strategy for at least 1 database, including any limits used, such that it could be repeated.                                                                                                                                                                            | 8 & Additional file 2 |
| Selection of sources of evidence†                     | 9    | State the process for selecting sources of evidence (i.e., screening and eligibility) included in the scoping review.                                                                                                                                                                                      | 9                     |
| Data charting process‡                                | 10   | Describe the methods of charting data from the included sources of evidence (e.g., calibrated forms or forms that have been tested by the team before their use, and whether data charting was done independently or in duplicate) and any processes for obtaining and confirming data from investigators. | 9                     |
| Data items                                            | 11   | List and define all variables for which data were sought and any assumptions and simplifications made.                                                                                                                                                                                                     | 9                     |
| Critical appraisal of individual sources of evidence§ | 12   | If done, provide a rationale for conducting a critical appraisal of included sources of evidence; describe the methods used and how this information was used in any data synthesis (if appropriate).                                                                                                      | n/a                   |

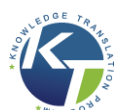



| SECTION                                       | ITEM | PRISMA-ScR CHECKLIST ITEM                                                                                                                                                                       | REPORTED ON PAGE # |
|-----------------------------------------------|------|-------------------------------------------------------------------------------------------------------------------------------------------------------------------------------------------------|--------------------|
| Synthesis of results                          | 13   | Describe the methods of handling and summarizing the data that were charted.                                                                                                                    | 10                 |
| <b>RESULTS</b>                                |      |                                                                                                                                                                                                 |                    |
| Selection of sources of evidence              | 14   | Give numbers of sources of evidence screened, assessed for eligibility, and included in the review, with reasons for exclusions at each stage, ideally using a flow diagram.                    | n/a                |
| Characteristics of sources of evidence        | 15   | For each source of evidence, present characteristics for which data were charted and provide the citations.                                                                                     | n/a                |
| Critical appraisal within sources of evidence | 16   | If done, present data on critical appraisal of included sources of evidence (see item 12).                                                                                                      | n/a                |
| Results of individual sources of evidence     | 17   | For each included source of evidence, present the relevant data that were charted that relate to the review questions and objectives.                                                           | n/a                |
| Synthesis of results                          | 18   | Summarize and/or present the charting results as they relate to the review questions and objectives.                                                                                            | n/a                |
| <b>DISCUSSION</b>                             |      |                                                                                                                                                                                                 |                    |
| Summary of evidence                           | 19   | Summarize the main results (including an overview of concepts, themes, and types of evidence available), link to the review questions and objectives, and consider the relevance to key groups. | n/a                |
| Limitations                                   | 20   | Discuss the limitations of the scoping review process.                                                                                                                                          | n/a                |
| Conclusions                                   | 21   | Provide a general interpretation of the results with respect to the review questions and objectives, as well as potential implications and/or next steps.                                       | 11                 |
| <b>FUNDING</b>                                |      |                                                                                                                                                                                                 |                    |
| Funding                                       | 22   | Describe sources of funding for the included sources of evidence, as well as sources of funding for the scoping review. Describe the role of the funders of the scoping review.                 | 18                 |

JBI = Joanna Briggs Institute; PRISMA-ScR = Preferred Reporting Items for Systematic reviews and Meta-Analyses extension for Scoping Reviews.

\* Where *sources of evidence* (see second footnote) are compiled from, such as bibliographic databases, social media platforms, and Web sites.

† A more inclusive/heterogeneous term used to account for the different types of evidence or data sources (e.g., quantitative and/or qualitative research, expert opinion, and policy documents) that may be eligible in a scoping review as opposed to only studies. This is not to be confused with *information sources* (see first footnote).

‡ The frameworks by Arksey and O'Malley (6) and Levac and colleagues (7) and the JBI guidance (4, 5) refer to the process of data extraction in a scoping review as data charting.

§ The process of systematically examining research evidence to assess its validity, results, and relevance before using it to inform a decision. This term is used for items 12 and 19 instead of "risk of bias" (which is more applicable to systematic reviews of interventions) to include and acknowledge the various sources of evidence that may be used in a scoping review (e.g., quantitative and/or qualitative research, expert opinion, and policy document).

From: Tricco AC, Lillie E, Zarin W, O'Brien KK, Colquhoun H, Levac D, et al. PRISMA Extension for Scoping Reviews (PRISMA-ScR): Checklist and Explanation. *Ann Intern Med.* 2018;169:467–473. doi: 10.7326/M18-0850.

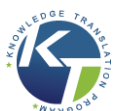

St. Michael's

Inspired Care.  
Inspiring Science.

For peer review only - <http://bmjopen.bmj.com/site/about/guidelines.xhtml>

1  
2  
3 **Database: PubMed**  
4  
5  
6  
7

| Search | Query                                                                                                                                                                                                                                                                                                                                                                                                                                                                                                                                                                                                                                                                                                                                        |
|--------|----------------------------------------------------------------------------------------------------------------------------------------------------------------------------------------------------------------------------------------------------------------------------------------------------------------------------------------------------------------------------------------------------------------------------------------------------------------------------------------------------------------------------------------------------------------------------------------------------------------------------------------------------------------------------------------------------------------------------------------------|
| #3     | Search: #1 AND #2                                                                                                                                                                                                                                                                                                                                                                                                                                                                                                                                                                                                                                                                                                                            |
| #2     | Search: health policy[mh] OR policy maker[tiab] OR policy makers[tiab] OR policymaker[tiab] OR policymakers[tiab] OR policy making[tiab] OR policymaking[tiab] OR decision making[mh] OR decision making[tiab] OR decisionmaking[tiab] OR decision maker[tiab] OR decision makers[tiab] OR stakeholder[tiab] OR stakeholders[tiab]                                                                                                                                                                                                                                                                                                                                                                                                           |
| #1     | Search: translational medical research[mh] OR translational medical research[tiab] OR translational medical science[tiab] OR medical translational research[tiab] OR translational medicine[tiab] OR knowledge translation[tiab] OR translational research[tiab] OR evidence-informed[tiab] OR evidence brief[tiab] OR evidence briefs[tiab] OR policy brief[tiab] OR policy briefs[tiab] OR deliberative dialogue[tiab] OR deliberative dialogues[tiab] OR knowledge synthesis[tiab] OR knowledge syntheses[tiab] OR knowledge transfer[tiab] OR research uptake[tiab] OR evidence summary[tiab] OR evidence summaries[tiab] OR knowledge uptake[tiab] OR knowledge exchange[tiab] OR research to action[tiab] OR knowledge to action[tiab] |
