# Supplementary material for: Characteristics of knowledge translation platforms and methods for evaluating them: a scoping review protocol
Source: HighWire-hosted journal article supplement (doi:10.1136/bmjopen-2022-061185), 2022-06-01
Supplement: bmjopen-2022-061185supp002_data_supplement.pdf [file bmjopen-2022-061185supp002_data_supplement.pdf]

**Database: PubMed**

| Search | Query                                                                                                                                                                                                                                                                                                                                                                                                                                                                                                                                                                                                                                                                                                                                        |
|--------|----------------------------------------------------------------------------------------------------------------------------------------------------------------------------------------------------------------------------------------------------------------------------------------------------------------------------------------------------------------------------------------------------------------------------------------------------------------------------------------------------------------------------------------------------------------------------------------------------------------------------------------------------------------------------------------------------------------------------------------------|
| #3     | Search: #1 AND #2                                                                                                                                                                                                                                                                                                                                                                                                                                                                                                                                                                                                                                                                                                                            |
| #2     | Search: health policy[mh] OR policy maker[tiab] OR policy makers[tiab] OR policymaker[tiab] OR policymakers[tiab] OR policy making[tiab] OR policymaking[tiab] OR decision making[mh] OR decision making[tiab] OR decisionmaking[tiab] OR decision maker[tiab] OR decision makers[tiab] OR stakeholder[tiab] OR stakeholders[tiab]                                                                                                                                                                                                                                                                                                                                                                                                           |
| #1     | Search: translational medical research[mh] OR translational medical research[tiab] OR translational medical science[tiab] OR medical translational research[tiab] OR translational medicine[tiab] OR knowledge translation[tiab] OR translational research[tiab] OR evidence-informed[tiab] OR evidence brief[tiab] OR evidence briefs[tiab] OR policy brief[tiab] OR policy briefs[tiab] OR deliberative dialogue[tiab] OR deliberative dialogues[tiab] OR knowledge synthesis[tiab] OR knowledge syntheses[tiab] OR knowledge transfer[tiab] OR research uptake[tiab] OR evidence summary[tiab] OR evidence summaries[tiab] OR knowledge uptake[tiab] OR knowledge exchange[tiab] OR research to action[tiab] OR knowledge to action[tiab] |
